# Supplementary material for: Tuberculosis Transmission among Immigrants and Autochthonous Populations of the Eastern Province of Saudi Arabia
Source: PubMed Central journal article supplement (PMC3798324; doi:10.1371/journal.pone.0077635), 2013-10-17
Supplement: pone.0077635.s002.pdf [file pone.0077635.s002.pdf]

| SI No | ID     | 154 | 424 | 577 | 580 | 802 | 960 | 1644 | 1955 | 2059 | 2163b | 2165 | 2347 | 2401 | 2461 | 2531 | 2687 | 2996 | 3007 | 3171 | 3192 | 3690 | 4052 | 4156 | 4348 | Lineage  |
|-------|--------|-----|-----|-----|-----|-----|-----|------|------|------|-------|------|------|------|------|------|------|------|------|------|------|------|------|------|------|----------|
| 1     | DRD11  | 2   | 4   | 4   | 2   | 3   | 3   | 3    | 5    | 2    | 6     | 4    | 4    | 4    | 2    | 5    | 1    | 7    | 3    | 3    | 5    | 3    | 8    | 2    | 3    | Beijing  |
| 2     | DRD113 | 2   | 4   | 4   | 2   | 3   | 3   | 3    | 3    | 2    | 6     | 4    | 4    | 4    | 1    | 5    | 1    | 7    | 3    | 3    | 5    | 3    | 8    | 2    | 3    | Beijing  |
| 3     | DRD122 | 2   | 4   | 4   | 2   | 3   | 3   | 3    | 5    | 2    | 6     | 4    | 4    | 4    | 2    | 5    | 1    | 5    | 3    | 3    | 5    | 3    | 8    | 2    | 3    | Beijing  |
| 4     | DRD125 | 2   | 4   | 4   | 2   | 3   | 3   | 3    | 5    | 2    | 6     | 4    | 4    | 4    | 2    | 5    | 1    | 5    | 3    | 3    | 5    | 3    | 8    | 2    | 3    | Beijing  |
| 5     | DRD139 | 2   | 4   | 4   | 2   | 3   | 3   | 3    | 6    | 2    | 3     | 4    | 4    | 4    | 2    | 5    | 1    | 7    | 3    | 3    | 5    | 3    | 7    | 2    | 3    | Beijing  |
| 6     | DRD172 | 2   | 4   | 4   | 2   | 3   | 2   | 3    | 5    | 2    | 6     | 4    | 4    | 4    | 2    | 5    | 1    | 5    | 3    | 3    | 5    | 3    | 8    | 2    | 3    | Beijing  |
| 7     | DRD178 | 2   | 4   | 4   | 2   | 3   | 3   | 3    | 5    | 2    | 3     | 4    | 4    | 4    | 2    | 5    | 1    | 5    | 3    | 3    | 5    | 3    | 8    | 2    | 3    | Beijing  |
| 8     | DRD193 | 2   | 4   | 4   | 2   | 3   | 2   | 3    | 5    | 1    | 6     | 3    | 4    | 4    | 2    | 5    | 1    | 5    | 3    | 3    | 5    | 3    | 7    | 2    | 3    | Beijing  |
| 9     | DRD223 | 2   | 4   | 4   | 2   | 3   | 2   | 3    | 5    | 2    | 6     | 3    | 4    | 4    | 2    | 5    | 1    | 5    | 3    | 3    | 5    | 3    | 8    | 2    | 3    | Beijing  |
| 10    | DRD276 | 2   | 4   | 4   | 2   | 3   | 3   | 3    | 6    | 2    | 3     | 4    | 4    | 4    | 1    | 5    | 1    | 5    | 3    | 3    | 5    | 3    | 8    | 2    | 3    | Beijing  |
| 11    | DRD295 | 2   | 4   | 4   | 2   | 3   | 2   | 3    | 5    | 2    | 3     | 3    | 4    | 4    | 2    | 5    | 1    | 7    | 2    | 3    | 5    | 3    | 7    | 2    | 3    | Beijing  |
| 12    | DRD297 | 2   | 4   | 4   | 2   | 3   | 2   | 3    | 5    | 2    | 3     | 3    | 4    | 4    | 2    | 5    | 1    | 7    | 3    | 3    | 5    | 3    | 7    | 2    | 3    | Beijing  |
| 13    | DRD3   | 2   | 4   | 4   | 2   | 3   | 3   | 3    | 5    | 2    | 6     | 4    | 4    | 4    | 2    | 5    | 1    | 5    | 3    | 3    | 5    | 3    | 8    | 2    | 3    | Beijing  |
| 14    | DRD309 | 2   | 4   | 4   | 2   | 3   | 3   | 3    | 6    | 2    | 6     | 4    | 4    | 4    | 2    | 5    | 1    | 7    | 3    | 3    | 5    | 3    | 7    | 2    | 3    | Beijing  |
| 15    | DRD33  | 2   | 4   | 4   | 2   | 3   | 3   | 4    | 6    | 2    | 3     | 4    | 4    | 4    | 2    | 5    | 1    | 5    | 3    | 3    | 5    | 3    | 8    | 2    | 3    | Beijing  |
| 16    | DRD334 | 2   | 4   | 4   | 2   | 3   | 2   | 3    | 6    | 2    | 3     | 4    | 4    | 4    | 2    | 5    | 1    | 5    | 3    | 3    | 5    | 3    | 8    | 2    | 3    | Beijing  |
| 17    | DRD418 | 2   | 4   | 4   | 2   | 3   | 3   | 3    | 5    | 2    | 6     | 4    | 4    | 4    | 2    | 5    | 1    | 7    | 3    | 3    | 5    | 3    | 7    | 2    | 3    | Beijing  |
| 18    | DRD421 | 2   | 4   | 4   | 2   | 3   | 3   | 3    | 5    | 2    | 3     | 4    | 4    | 4    | 2    | 5    | 1    | 5    | 3    | 3    | 5    | 3    | 8    | 2    | 3    | Beijing  |
| 19    | DRD427 | 2   | 4   | 4   | 2   | 3   | 3   | 3    | 5    | 2    | 3     | 4    | 4    | 4    | 2    | 5    | 1    | 5    | 3    | 3    | 5    | 3    | 8    | 2    | 3    | Beijing  |
| 20    | DRD459 | 2   | 4   | 4   | 2   | 3   | 3   | 3    | 6    | 2    | 6     | 4    | 4    | 4    | 2    | 5    | 1    | 4    | 3    | 3    | 5    | 3    | 8    | 2    | 3    | Beijing  |
| 21    | DRD461 | 2   | 4   | 4   | 2   | 3   | 2   | 3    | 5    | 2    | 3     | 3    | 4    | 4    | 2    | 5    | 1    | 7    | 3    | 3    | 5    | 3    | 8    | 2    | 3    | Beijing  |
| 22    | DRD494 | 2   | 4   | 4   | 2   | 3   | 3   | 3    | 5    | 2    | 3     | 4    | 4    | 4    | 2    | 5    | 1    | 5    | 3    | 3    | 5    | 3    | 7    | 2    | 3    | Beijing  |
| 23    | DRD497 | 2   | 4   | 4   | 2   | 3   | 3   | 3    | 5    | 2    | 6     | 4    | 4    | 4    | 2    | 5    | 1    | 7    | 3    | 3    | 5    | 3    | 8    | 2    | 3    | Beijing  |
| 24    | DRD506 | 2   | 4   | 4   | 2   | 3   | 3   | 3    | 5    | 2    | 3     | 4    | 4    | 4    | 1    | 5    | 1    | 5    | 3    | 3    | 5    | 3    | 7    | 2    | 3    | Beijing  |
| 25    | DRD515 | 2   | 4   | 4   | 2   | 3   | 3   | 3    | 5    | 2    | 3     | 4    | 4    | 4    | 2    | 5    | 1    | 5    | 3    | 3    | 5    | 3    | 8    | 2    | 3    | Beijing  |
| 26    | DRD520 | 2   | 4   | 4   | 2   | 3   | 2   | 2    | 4    | 2    | 3     | 3    | 4    | 4    | 2    | 5    | 1    | 5    | 3    | 3    | 5    | 3    | 7    | 2    | 3    | Beijing  |
| 27    | DRD527 | 2   | 3   | 3   | 2   | 3   | 3   | 2    | 5    | 2    | 3     | 4    | 4    | 4    | 2    | 5    | 1    | 5    | 3    | 3    | 5    | 3    | 7    | 2    | 3    | Beijing  |
| 28    | DRD544 | 2   | 4   | 4   | 2   | 3   | 3   | 3    | 5    | 2    | 6     | 4    | 4    | 4    | 2    | 5    | 1    | 5    | 3    | 3    | 5    | 3    | 8    | 2    | 3    | Beijing  |
| 29    | DRD551 | 2   | 4   | 4   | 2   | 3   | 2   | 3    | 5    | 2    | 3     | 3    | 4    | 4    | 2    | 5    | 1    | 5    | 3    | 3    | 5    | 3    | 7    | 2    | 3    | Beijing  |
| 30    | DRD585 | 2   | 2   | 4   | 2   | 3   | 3   | 3    | 6    | 2    | 3     | 4    | 4    | 4    | 2    | 5    | 1    | 5    | 3    | 3    | 5    | 3    | 8    | 2    | 3    | Beijing  |
| 31    | DRD637 | 2   | 4   | 4   | 2   | 3   | 3   | 3    | 5    | 2    | 6     | 4    | 4    | 4    | 2    | 5    | 1    | 5    | 3    | 3    | 5    | 3    | 8    | 2    | 3    | Beijing  |
| 32    | DRD638 | 2   | 4   | 4   | 2   | 3   | 3   | 3    | 5    | 2    | 6     | 4    | 4    | 4    | 2    | 5    | 1    | 7    | 3    | 3    | 5    | 3    | 8    | 2    | 3    | Beijing  |
| 33    | DRD674 | 2   | 4   | 4   | 2   | 3   | 3   | 3    | 5    | 2    | 3     | 4    | 4    | 4    | 2    | 5    | 1    | 7    | 3    | 3    | 2    | 3    | 8    | 2    | 3    | Beijing  |
| 34    | DRD700 | 2   | 4   | 4   | 2   | 3   | 3   | 3    | 5    | 2    | 6     | 4    | 4    | 4    | 2    | 5    | 1    | 5    | 3    | 3    | 5    | 3    | 8    | 2    | 3    | Beijing  |
| 35    | DRD701 | 2   | 4   | 4   | 2   | 3   | 3   | 3    | 6    | 2    | 6     | 4    | 4    | 4    | 2    | 5    | 1    | 5    | 3    | 3    | 4    | 3    | 8    | 2    | 3    | Beijing  |
| 36    | DRD785 | 2   | 4   | 4   | 2   | 3   | 1   | 3    | 5    | 2    | 3     | 3    | 4    | 4    | 2    | 5    | 1    | 7    | 2    | 3    | 5    | 3    | 7    | 2    | 3    | Beijing  |
| 37    | DRD87  | 2   | 4   | 4   | 2   | 3   | 2   | 3    | 5    | 2    | 3     | 4    | 4    | 4    | 2    | 5    | 1    | 5    | 3    | 3    | 5    | 3    | 7    | 2    | 3    | Beijing  |
| 38    | DRD895 | 2   | 4   | 4   | 2   | 3   | 2   | 3    | 5    | 2    | 3     | 3    | 4    | 3    | 2    | 5    | 1    | 7    | 2    | 3    | 5    | 3    | 7    | 2    | 3    | Beijing  |
| 39    | DRD105 | 2   | 2   | 4   | 2   | 3   | 4   | 3    | 3    | 1    | 6     | 3    | 4    | 2    | 2    | 5    | 1    | 5    | 3    | 3    | 3    | 7    | 5    | 2    | 2    | Cameroon |

|    |        |   |   |   |   |   |   |   |   |   |   |   |   |   |   |   |   |   |   |   |   |   |   |   |   |           |
|----|--------|---|---|---|---|---|---|---|---|---|---|---|---|---|---|---|---|---|---|---|---|---|---|---|---|-----------|
| 40 | DRD228 | 2 | 2 | 4 | 2 | 3 | 4 | 3 | 3 | 1 | 5 | 3 | 4 | 2 | 2 | 5 | 1 | 5 | 3 | 3 | 3 | 7 | 5 | 2 | 2 | Cameroon  |
| 41 | DRD249 | 2 | 2 | 4 | 2 | 3 | 4 | 3 | 3 | 1 | 4 | 3 | 4 | 2 | 2 | 5 | 1 | 5 | 3 | 3 | 3 | 7 | 5 | 2 | 2 | Cameroon  |
| 42 | DRD65  | 2 | 2 | 4 | 2 | 3 | 4 | 2 | 3 | 1 | 6 | 3 | 4 | 2 | 2 | 5 | 1 | 5 | 3 | 3 | 3 | 7 | 5 | 2 | 2 | Cameroon  |
| 43 | DRD111 | 2 | 3 | 2 | 2 | 3 | 6 | 2 | 4 | 2 | 7 | 4 | 4 | 2 | 2 | 5 | 1 | 7 | 3 | 3 | 5 | 3 | 8 | 3 | 2 | Delhi/CAS |
| 44 | DRD116 | 2 | 3 | 2 | 2 | 3 | 6 | 2 | 4 | 2 | 2 | 4 | 4 | 2 | 2 | 5 | 1 | 7 | 3 | 3 | 5 | 3 | 5 | 4 | 3 | Delhi/CAS |
| 45 | DRD120 | 2 | 5 | 2 | 2 | 3 | 5 | 2 | 4 | 2 | 2 | 4 | 4 | 2 | 2 | 6 | 1 | 7 | 3 | 3 | 4 | 2 | 7 | 3 | 2 | Delhi/CAS |
| 46 | DRD123 | 2 | 3 | 2 | 2 | 3 | 6 | 2 | 4 | 2 | 2 | 3 | 4 | 2 | 2 | 5 | 1 | 7 | 3 | 3 | 5 | 3 | 2 | 2 | 3 | Delhi/CAS |
| 47 | DRD129 | 2 | 3 | 2 | 2 | 3 | 6 | 2 | 4 | 2 | 2 | 4 | 4 | 2 | 2 | 5 | 1 | 7 | 3 | 3 | 5 | 3 | 5 | 4 | 3 | Delhi/CAS |
| 48 | DRD130 | 2 | 3 | 2 | 2 | 3 | 6 | 2 | 4 | 2 | 2 | 4 | 4 | 2 | 2 | 5 | 1 | 7 | 3 | 3 | 5 | 3 | 2 | 2 | 3 | Delhi/CAS |
| 49 | DRD132 | 2 | 3 | 2 | 2 | 3 | 6 | 2 | 4 | 2 | 2 | 4 | 4 | 2 | 2 | 5 | 1 | 7 | 3 | 3 | 5 | 3 | 2 | 4 | 3 | Delhi/CAS |
| 50 | DRD140 | 2 | 3 | 2 | 2 | 3 | 6 | 2 | 4 | 2 | 2 | 4 | 4 | 2 | 2 | 5 | 1 | 7 | 3 | 3 | 5 | 3 | 5 | 4 | 3 | Delhi/CAS |
| 51 | DRD149 | 2 | 3 | 2 | 2 | 3 | 5 | 2 | 4 | 2 | 7 | 3 | 4 | 2 | 2 | 5 | 1 | 4 | 3 | 3 | 5 | 3 | 8 | 3 | 2 | Delhi/CAS |
| 52 | DRD15  | 2 | 4 | 2 | 2 | 3 | 4 | 4 | 5 | 2 | 2 | 4 | 4 | 2 | 2 | 5 | 1 | 7 | 3 | 3 | 4 | 3 | 2 | 4 | 2 | Delhi/CAS |
| 53 | DRD165 | 2 | 3 | 2 | 2 | 3 | 6 | 2 | 4 | 2 | 2 | 4 | 4 | 2 | 2 | 5 | 1 | 7 | 3 | 3 | 5 | 3 | 2 | 2 | 3 | Delhi/CAS |
| 54 | DRD166 | 2 | 3 | 2 | 2 | 3 | 6 | 2 | 4 | 2 | 2 | 4 | 4 | 2 | 2 | 5 | 1 | 7 | 3 | 3 | 5 | 3 | 5 | 4 | 3 | Delhi/CAS |
| 55 | DRD167 | 2 | 4 | 2 | 2 | 3 | 7 | 4 | 4 | 2 | 2 | 4 | 4 | 2 | 2 | 5 | 1 | 6 | 3 | 3 | 5 | 3 | 5 | 4 | 3 | Delhi/CAS |
| 56 | DRD169 | 2 | 3 | 2 | 2 | 3 | 6 | 2 | 4 | 2 | 7 | 4 | 4 | 2 | 2 | 5 | 1 | 7 | 3 | 3 | 5 | 3 | 8 | 3 | 2 | Delhi/CAS |
| 57 | DRD17  | 2 | 3 | 2 | 2 | 3 | 6 | 2 | 4 | 2 | 2 | 4 | 4 | 2 | 1 | 5 | 1 | 7 | 3 | 3 | 5 | 3 | 2 | 4 | 3 | Delhi/CAS |
| 58 | DRD171 | 2 | 3 | 2 | 2 | 3 | 6 | 2 | 4 | 2 | 2 | 4 | 4 | 2 | 2 | 5 | 1 | 7 | 3 | 3 | 5 | 3 | 2 | 2 | 3 | Delhi/CAS |
| 59 | DRD174 | 2 | 3 | 2 | 2 | 3 | 6 | 2 | 4 | 2 | 2 | 4 | 4 | 2 | 2 | 5 | 1 | 7 | 3 | 3 | 5 | 3 | 2 | 2 | 3 | Delhi/CAS |
| 60 | DRD176 | 2 | 4 | 2 | 2 | 3 | 5 | 4 | 4 | 2 | 2 | 4 | 4 | 2 | 2 | 4 | 1 | 8 | 3 | 3 | 4 | 3 | 8 | 4 | 3 | Delhi/CAS |
| 61 | DRD177 | 2 | 4 | 2 | 2 | 3 | 6 | 4 | 4 | 2 | 2 | 4 | 4 | 2 | 2 | 5 | 1 | 7 | 3 | 3 | 5 | 3 | 8 | 4 | 2 | Delhi/CAS |
| 62 | DRD179 | 2 | 3 | 2 | 2 | 2 | 6 | 4 | 4 | 2 | 3 | 4 | 4 | 1 | 2 | 5 | 1 | 7 | 3 | 3 | 5 | 3 | 2 | 2 | 2 | Delhi/CAS |
| 63 | DRD181 | 2 | 3 | 2 | 2 | 3 | 6 | 2 | 4 | 2 | 2 | 4 | 4 | 2 | 2 | 5 | 1 | 7 | 3 | 3 | 5 | 3 | 2 | 4 | 3 | Delhi/CAS |
| 64 | DRD186 | 2 | 3 | 2 | 2 | 3 | 6 | 2 | 4 | 2 | 7 | 4 | 4 | 2 | 2 | 4 | 1 | 7 | 3 | 3 | 5 | 3 | 7 | 3 | 2 | Delhi/CAS |
| 65 | DRD19  | 2 | 4 | 2 | 2 | 3 | 5 | 4 | 4 | 2 | 2 | 4 | 4 | 2 | 2 | 4 | 1 | 8 | 3 | 3 | 4 | 3 | 8 | 4 | 3 | Delhi/CAS |
| 66 | DRD192 | 2 | 3 | 2 | 2 | 3 | 6 | 4 | 4 | 2 | 2 | 4 | 4 | 2 | 2 | 5 | 1 | 5 | 3 | 3 | 5 | 3 | 6 | 4 | 3 | Delhi/CAS |
| 67 | DRD197 | 2 | 3 | 2 | 2 | 3 | 6 | 2 | 4 | 2 | 2 | 4 | 4 | 2 | 1 | 5 | 1 | 7 | 3 | 3 | 5 | 3 | 2 | 2 | 3 | Delhi/CAS |
| 68 | DRD199 | 2 | 3 | 2 | 2 | 3 | 5 | 2 | 4 | 2 | 7 | 4 | 4 | 2 | 2 | 5 | 1 | 7 | 3 | 3 | 5 | 3 | 8 | 3 | 2 | Delhi/CAS |
| 69 | DRD2   | 2 | 4 | 2 | 2 | 3 | 5 | 4 | 4 | 2 | 2 | 4 | 4 | 2 | 2 | 4 | 1 | 8 | 3 | 3 | 4 | 3 | 8 | 4 | 3 | Delhi/CAS |
| 70 | DRD20  | 2 | 3 | 2 | 2 | 3 | 4 | 4 | 4 | 2 | 2 | 4 | 4 | 2 | 2 | 5 | 1 | 7 | 3 | 3 | 4 | 3 | 2 | 4 | 2 | Delhi/CAS |
| 71 | DRD201 | 2 | 3 | 2 | 2 | 3 | 6 | 2 | 4 | 2 | 7 | 4 | 4 | 2 | 2 | 4 | 1 | 4 | 3 | 3 | 5 | 3 | 8 | 3 | 2 | Delhi/CAS |
| 72 | DRD204 | 2 | 3 | 2 | 2 | 3 | 6 | 4 | 4 | 2 | 2 | 4 | 4 | 2 | 2 | 5 | 1 | 5 | 3 | 3 | 5 | 2 | 6 | 4 | 3 | Delhi/CAS |
| 73 | DRD206 | 2 | 3 | 2 | 2 | 3 | 5 | 4 | 4 | 2 | 2 | 4 | 4 | 2 | 2 | 5 | 1 | 5 | 3 | 3 | 5 | 4 | 7 | 4 | 3 | Delhi/CAS |
| 74 | DRD209 | 2 | 4 | 2 | 2 | 3 | 6 | 4 | 4 | 2 | 2 | 4 | 4 | 2 | 2 | 5 | 1 | 7 | 3 | 3 | 5 | 3 | 8 | 4 | 2 | Delhi/CAS |
| 75 | DRD211 | 2 | 4 | 2 | 2 | 3 | 5 | 4 | 4 | 2 | 2 | 4 | 4 | 2 | 2 | 4 | 1 | 8 | 3 | 3 | 4 | 3 | 8 | 4 | 3 | Delhi/CAS |
| 76 | DRD212 | 2 | 3 | 2 | 2 | 3 | 6 | 2 | 4 | 2 | 7 | 4 | 4 | 2 | 2 | 5 | 1 | 7 | 3 | 3 | 5 | 3 | 7 | 3 | 2 | Delhi/CAS |
| 77 | DRD213 | 2 | 3 | 2 | 2 | 3 | 5 | 2 | 4 | 2 | 7 | 4 | 4 | 2 | 2 | 4 | 1 | 4 | 3 | 3 | 5 | 3 | 8 | 3 | 2 | Delhi/CAS |
| 78 | DRD214 | 2 | 3 | 2 | 2 | 3 | 6 | 2 | 4 | 2 | 7 | 4 | 4 | 2 | 2 | 5 | 1 | 4 | 3 | 3 | 5 | 3 | 8 | 3 | 2 | Delhi/CAS |
| 79 | DRD215 | 2 | 3 | 2 | 2 | 3 | 6 | 3 | 4 | 2 | 2 | 4 | 4 | 2 | 2 | 4 | 1 | 7 | 3 | 3 | 5 | 3 | 2 | 2 | 3 | Delhi/CAS |

|     |        |   |   |   |   |   |   |   |   |   |   |   |   |   |   |   |   |   |   |   |   |   |   |   |   |           |
|-----|--------|---|---|---|---|---|---|---|---|---|---|---|---|---|---|---|---|---|---|---|---|---|---|---|---|-----------|
| 80  | DRD217 | 2 | 3 | 2 | 2 | 3 | 6 | 4 | 4 | 2 | 2 | 4 | 4 | 2 | 2 | 5 | 1 | 5 | 3 | 3 | 5 | 3 | 5 | 4 | 3 | Delhi/CAS |
| 81  | DRD22  | 2 | 4 | 2 | 2 | 3 | 6 | 4 | 4 | 2 | 2 | 4 | 4 | 2 | 2 | 4 | 1 | 8 | 3 | 3 | 4 | 3 | 8 | 4 | 3 | Delhi/CAS |
| 82  | DRD221 | 2 | 3 | 2 | 2 | 3 | 5 | 2 | 4 | 2 | 7 | 4 | 4 | 2 | 2 | 4 | 1 | 7 | 3 | 3 | 5 | 3 | 8 | 3 | 2 | Delhi/CAS |
| 83  | DRD230 | 2 | 4 | 2 | 2 | 3 | 5 | 4 | 4 | 2 | 2 | 4 | 4 | 2 | 2 | 4 | 1 | 8 | 3 | 3 | 4 | 3 | 8 | 4 | 3 | Delhi/CAS |
| 84  | DRD231 | 2 | 4 | 2 | 2 | 3 | 6 | 4 | 4 | 2 | 2 | 4 | 4 | 2 | 2 | 4 | 1 | 7 | 3 | 3 | 3 | 3 | 8 | 4 | 3 | Delhi/CAS |
| 85  | DRD232 | 2 | 4 | 2 | 2 | 3 | 5 | 4 | 4 | 2 | 2 | 3 | 4 | 2 | 2 | 4 | 1 | 8 | 3 | 3 | 4 | 3 | 7 | 4 | 3 | Delhi/CAS |
| 86  | DRD234 | 2 | 4 | 2 | 2 | 3 | 6 | 4 | 4 | 2 | 2 | 4 | 4 | 2 | 2 | 4 | 1 | 8 | 3 | 3 | 4 | 3 | 8 | 4 | 3 | Delhi/CAS |
| 87  | DRD238 | 2 | 3 | 2 | 2 | 3 | 6 | 2 | 4 | 2 | 2 | 4 | 4 | 1 | 2 | 5 | 1 | 7 | 3 | 3 | 5 | 3 | 2 | 2 | 3 | Delhi/CAS |
| 88  | DRD239 | 2 | 4 | 2 | 2 | 3 | 5 | 4 | 4 | 2 | 2 | 4 | 4 | 3 | 2 | 4 | 1 | 8 | 3 | 3 | 3 | 3 | 8 | 4 | 3 | Delhi/CAS |
| 89  | DRD240 | 2 | 3 | 2 | 2 | 3 | 6 | 2 | 4 | 2 | 2 | 4 | 4 | 2 | 2 | 5 | 1 | 7 | 3 | 3 | 5 | 3 | 2 | 2 | 3 | Delhi/CAS |
| 90  | DRD243 | 2 | 2 | 2 | 2 | 3 | 6 | 2 | 4 | 2 | 7 | 4 | 4 | 2 | 2 | 5 | 1 | 3 | 3 | 3 | 5 | 3 | 8 | 3 | 2 | Delhi/CAS |
| 91  | DRD244 | 2 | 4 | 2 | 2 | 3 | 5 | 4 | 4 | 2 | 2 | 3 | 4 | 2 | 2 | 4 | 1 | 7 | 3 | 3 | 4 | 3 | 8 | 4 | 3 | Delhi/CAS |
| 92  | DRD250 | 2 | 3 | 2 | 2 | 3 | 6 | 2 | 4 | 2 | 7 | 4 | 4 | 2 | 2 | 5 | 1 | 7 | 3 | 3 | 5 | 3 | 7 | 3 | 2 | Delhi/CAS |
| 93  | DRD252 | 2 | 3 | 4 | 2 | 3 | 4 | 3 | 4 | 2 | 3 | 3 | 4 | 2 | 2 | 5 | 1 | 7 | 3 | 3 | 5 | 3 | 8 | 4 | 3 | Delhi/CAS |
| 94  | DRD255 | 2 | 4 | 2 | 2 | 3 | 5 | 4 | 4 | 2 | 2 | 4 | 4 | 2 | 2 | 4 | 1 | 8 | 3 | 3 | 3 | 3 | 8 | 4 | 3 | Delhi/CAS |
| 95  | DRD263 | 2 | 4 | 2 | 2 | 3 | 5 | 4 | 4 | 2 | 2 | 4 | 4 | 2 | 2 | 4 | 1 | 7 | 3 | 3 | 4 | 3 | 8 | 4 | 3 | Delhi/CAS |
| 96  | DRD267 | 2 | 3 | 2 | 2 | 3 | 6 | 3 | 4 | 2 | 2 | 4 | 4 | 2 | 2 | 5 | 1 | 7 | 3 | 3 | 5 | 3 | 2 | 2 | 3 | Delhi/CAS |
| 97  | DRD281 | 2 | 3 | 2 | 2 | 3 | 5 | 4 | 4 | 2 | 2 | 3 | 4 | 2 | 2 | 4 | 1 | 8 | 3 | 3 | 4 | 3 | 7 | 4 | 3 | Delhi/CAS |
| 98  | DRD284 | 2 | 3 | 2 | 2 | 3 | 5 | 2 | 4 | 2 | 7 | 4 | 4 | 2 | 2 | 6 | 1 | 3 | 3 | 3 | 5 | 3 | 8 | 3 | 2 | Delhi/CAS |
| 99  | DRD288 | 2 | 4 | 2 | 2 | 3 | 6 | 4 | 4 | 2 | 2 | 4 | 4 | 2 | 2 | 4 | 1 | 8 | 3 | 3 | 4 | 3 | 8 | 4 | 3 | Delhi/CAS |
| 100 | DRD296 | 2 | 3 | 2 | 2 | 3 | 6 | 2 | 4 | 2 | 7 | 4 | 4 | 2 | 2 | 5 | 1 | 7 | 3 | 3 | 5 | 3 | 7 | 2 | 2 | Delhi/CAS |
| 101 | DRD299 | 2 | 5 | 2 | 2 | 3 | 3 | 4 | 4 | 2 | 2 | 4 | 4 | 2 | 2 | 5 | 1 | 7 | 3 | 1 | 5 | 3 | 8 | 4 | 2 | Delhi/CAS |
| 102 | DRD304 | 2 | 3 | 2 | 2 | 3 | 5 | 4 | 4 | 2 | 2 | 4 | 4 | 2 | 2 | 5 | 1 | 7 | 3 | 3 | 5 | 4 | 1 | 4 | 3 | Delhi/CAS |
| 103 | DRD314 | 2 | 5 | 4 | 2 | 3 | 5 | 4 | 4 | 2 | 6 | 4 | 4 | 2 | 2 | 5 | 1 | 7 | 3 | 3 | 5 | 3 | 8 | 4 | 3 | Delhi/CAS |
| 104 | DRD316 | 2 | 3 | 2 | 2 | 3 | 5 | 2 | 4 | 2 | 7 | 4 | 4 | 2 | 2 | 5 | 1 | 7 | 3 | 3 | 5 | 3 | 8 | 3 | 2 | Delhi/CAS |
| 105 | DRD317 | 2 | 3 | 2 | 2 | 3 | 6 | 2 | 4 | 2 | 7 | 4 | 4 | 2 | 2 | 5 | 1 | 7 | 3 | 3 | 5 | 3 | 7 | 3 | 2 | Delhi/CAS |
| 106 | DRD318 | 2 | 3 | 3 | 2 | 3 | 6 | 3 | 4 | 2 | 2 | 4 | 4 | 2 | 2 | 4 | 1 | 7 | 3 | 3 | 5 | 4 | 8 | 2 | 3 | Delhi/CAS |
| 107 | DRD321 | 2 | 4 | 3 | 2 | 3 | 6 | 4 | 4 | 2 | 5 | 3 | 4 | 4 | 2 | 5 | 1 | 7 | 3 | 3 | 5 | 4 | 7 | 2 | 2 | Delhi/CAS |
| 108 | DRD323 | 2 | 3 | 2 | 2 | 3 | 6 | 2 | 4 | 2 | 7 | 4 | 4 | 2 | 2 | 6 | 1 | 3 | 3 | 3 | 5 | 3 | 8 | 3 | 2 | Delhi/CAS |
| 109 | DRD325 | 2 | 4 | 2 | 2 | 3 | 6 | 3 | 6 | 2 | 2 | 4 | 4 | 2 | 2 | 5 | 1 | 6 | 3 | 4 | 5 | 3 | 6 | 4 | 3 | Delhi/CAS |
| 110 | DRD326 | 2 | 3 | 2 | 2 | 3 | 5 | 2 | 4 | 2 | 7 | 4 | 4 | 2 | 2 | 5 | 1 | 7 | 3 | 3 | 5 | 3 | 8 | 3 | 2 | Delhi/CAS |
| 111 | DRD331 | 2 | 3 | 2 | 2 | 3 | 6 | 2 | 4 | 2 | 2 | 4 | 4 | 2 | 2 | 5 | 1 | 7 | 3 | 3 | 5 | 3 | 2 | 4 | 3 | Delhi/CAS |
| 112 | DRD333 | 2 | 3 | 2 | 2 | 3 | 6 | 2 | 4 | 2 | 7 | 4 | 4 | 2 | 2 | 5 | 1 | 7 | 3 | 3 | 5 | 3 | 8 | 3 | 2 | Delhi/CAS |
| 113 | DRD338 | 2 | 3 | 2 | 2 | 3 | 6 | 2 | 4 | 2 | 7 | 4 | 4 | 2 | 2 | 6 | 1 | 3 | 3 | 3 | 5 | 3 | 8 | 2 | 2 | Delhi/CAS |
| 114 | DRD344 | 2 | 3 | 2 | 2 | 3 | 5 | 2 | 4 | 2 | 7 | 4 | 4 | 2 | 2 | 5 | 1 | 7 | 3 | 3 | 5 | 3 | 7 | 3 | 2 | Delhi/CAS |
| 115 | DRD348 | 2 | 3 | 2 | 2 | 3 | 6 | 2 | 4 | 2 | 2 | 4 | 4 | 2 | 2 | 5 | 1 | 7 | 3 | 3 | 5 | 3 | 2 | 4 | 3 | Delhi/CAS |
| 116 | DRD358 | 2 | 3 | 2 | 2 | 3 | 6 | 2 | 4 | 2 | 7 | 4 | 4 | 2 | 2 | 5 | 1 | 4 | 3 | 3 | 5 | 1 | 8 | 3 | 2 | Delhi/CAS |
| 117 | DRD361 | 2 | 3 | 2 | 2 | 3 | 6 | 2 | 4 | 2 | 7 | 4 | 4 | 2 | 2 | 5 | 1 | 5 | 3 | 3 | 5 | 3 | 8 | 3 | 2 | Delhi/CAS |
| 118 | DRD37  | 2 | 4 | 2 | 2 | 3 | 4 | 4 | 4 | 2 | 2 | 4 | 4 | 2 | 2 | 5 | 1 | 7 | 3 | 3 | 5 | 4 | 6 | 4 | 3 | Delhi/CAS |
| 119 | DRD370 | 2 | 3 | 2 | 2 | 3 | 6 | 2 | 4 | 2 | 2 | 4 | 4 | 2 | 2 | 5 | 1 | 7 | 3 | 3 | 5 | 3 | 2 | 4 | 3 | Delhi/CAS |

|     |        |   |   |   |   |   |   |   |   |   |   |   |   |   |   |   |   |   |   |   |   |   |   |   |   |           |
|-----|--------|---|---|---|---|---|---|---|---|---|---|---|---|---|---|---|---|---|---|---|---|---|---|---|---|-----------|
| 120 | DRD373 | 2 | 3 | 2 | 2 | 3 | 5 | 2 | 4 | 2 | 7 | 4 | 4 | 2 | 2 | 6 | 1 | 7 | 3 | 3 | 5 | 3 | 8 | 3 | 2 | Delhi/CAS |
| 121 | DRD378 | 2 | 3 | 2 | 2 | 3 | 6 | 2 | 4 | 2 | 2 | 4 | 4 | 2 | 2 | 5 | 1 | 7 | 3 | 3 | 5 | 3 | 2 | 2 | 3 | Delhi/CAS |
| 122 | DRD38  | 2 | 3 | 2 | 2 | 3 | 6 | 2 | 4 | 2 | 2 | 4 | 4 | 2 | 2 | 5 | 1 | 7 | 3 | 3 | 5 | 3 | 2 | 4 | 3 | Delhi/CAS |
| 123 | DRD385 | 2 | 3 | 2 | 2 | 3 | 6 | 2 | 4 | 2 | 7 | 4 | 4 | 2 | 2 | 5 | 1 | 4 | 3 | 3 | 5 | 3 | 7 | 3 | 2 | Delhi/CAS |
| 124 | DRD389 | 2 | 3 | 2 | 2 | 3 | 6 | 2 | 4 | 2 | 2 | 4 | 4 | 2 | 2 | 5 | 1 | 7 | 3 | 3 | 5 | 3 | 2 | 4 | 3 | Delhi/CAS |
| 125 | DRD39  | 2 | 4 | 2 | 1 | 3 | 7 | 4 | 4 | 2 | 2 | 4 | 4 | 2 | 2 | 5 | 1 | 7 | 3 | 3 | 5 | 3 | 5 | 4 | 3 | Delhi/CAS |
| 126 | DRD394 | 2 | 3 | 2 | 2 | 3 | 6 | 2 | 4 | 2 | 7 | 4 | 4 | 2 | 2 | 5 | 1 | 3 | 3 | 3 | 5 | 3 | 8 | 3 | 2 | Delhi/CAS |
| 127 | DRD402 | 2 | 2 | 2 | 2 | 3 | 6 | 2 | 4 | 2 | 2 | 4 | 4 | 2 | 2 | 5 | 1 | 7 | 3 | 3 | 5 | 3 | 2 | 2 | 3 | Delhi/CAS |
| 128 | DRD404 | 2 | 3 | 2 | 2 | 3 | 5 | 2 | 4 | 2 | 7 | 4 | 4 | 2 | 2 | 5 | 1 | 7 | 3 | 3 | 5 | 3 | 8 | 3 | 2 | Delhi/CAS |
| 129 | DRD407 | 2 | 4 | 1 | 2 | 3 | 5 | 4 | 4 | 2 | 2 | 4 | 4 | 2 | 2 | 4 | 1 | 8 | 3 | 3 | 3 | 3 | 8 | 4 | 3 | Delhi/CAS |
| 130 | DRD408 | 2 | 3 | 4 | 2 | 3 | 3 | 2 | 4 | 2 | 6 | 4 | 4 | 2 | 2 | 5 | 1 | 4 | 3 | 3 | 5 | 3 | 8 | 3 | 3 | Delhi/CAS |
| 131 | DRD410 | 2 | 3 | 2 | 2 | 3 | 6 | 2 | 4 | 2 | 7 | 4 | 4 | 2 | 2 | 6 | 1 | 7 | 3 | 3 | 5 | 3 | 7 | 2 | 2 | Delhi/CAS |
| 132 | DRD413 | 2 | 4 | 2 | 2 | 3 | 5 | 4 | 4 | 2 | 2 | 4 | 4 | 2 | 2 | 4 | 1 | 8 | 3 | 3 | 4 | 3 | 8 | 4 | 3 | Delhi/CAS |
| 133 | DRD437 | 2 | 3 | 2 | 2 | 3 | 6 | 2 | 3 | 2 | 2 | 4 | 4 | 2 | 1 | 5 | 1 | 7 | 3 | 3 | 5 | 3 | 2 | 2 | 3 | Delhi/CAS |
| 134 | DRD438 | 2 | 3 | 2 | 2 | 3 | 6 | 2 | 4 | 2 | 7 | 4 | 4 | 2 | 2 | 5 | 1 | 7 | 3 | 3 | 5 | 1 | 8 | 3 | 2 | Delhi/CAS |
| 135 | DRD442 | 2 | 3 | 2 | 2 | 3 | 6 | 3 | 4 | 2 | 2 | 4 | 4 | 2 | 2 | 5 | 1 | 7 | 3 | 3 | 5 | 3 | 2 | 2 | 3 | Delhi/CAS |
| 136 | DRD444 | 2 | 3 | 2 | 2 | 3 | 5 | 2 | 3 | 2 | 2 | 4 | 4 | 2 | 2 | 5 | 1 | 7 | 3 | 3 | 5 | 3 | 2 | 2 | 3 | Delhi/CAS |
| 137 | DRD450 | 2 | 4 | 2 | 2 | 3 | 6 | 4 | 4 | 2 | 2 | 4 | 4 | 2 | 2 | 4 | 1 | 7 | 3 | 3 | 4 | 3 | 8 | 4 | 3 | Delhi/CAS |
| 138 | DRD451 | 2 | 3 | 2 | 2 | 3 | 6 | 2 | 4 | 2 | 2 | 4 | 4 | 2 | 1 | 5 | 1 | 7 | 3 | 3 | 4 | 3 | 5 | 2 | 3 | Delhi/CAS |
| 139 | DRD457 | 2 | 5 | 2 | 2 | 3 | 5 | 2 | 4 | 2 | 2 | 4 | 4 | 2 | 2 | 6 | 1 | 7 | 3 | 3 | 5 | 2 | 8 | 3 | 2 | Delhi/CAS |
| 140 | DRD46  | 2 | 3 | 2 | 2 | 3 | 5 | 2 | 4 | 2 | 2 | 4 | 4 | 2 | 2 | 5 | 1 | 7 | 3 | 3 | 5 | 3 | 2 | 2 | 3 | Delhi/CAS |
| 141 | DRD466 | 2 | 3 | 2 | 2 | 3 | 5 | 2 | 4 | 2 | 7 | 4 | 4 | 2 | 2 | 5 | 1 | 3 | 3 | 3 | 5 | 3 | 8 | 3 | 2 | Delhi/CAS |
| 142 | DRD471 | 2 | 3 | 2 | 2 | 3 | 6 | 2 | 4 | 2 | 7 | 4 | 4 | 2 | 2 | 5 | 1 | 7 | 3 | 3 | 5 | 3 | 7 | 3 | 2 | Delhi/CAS |
| 143 | DRD478 | 2 | 3 | 2 | 2 | 4 | 5 | 2 | 4 | 2 | 2 | 4 | 4 | 2 | 2 | 5 | 1 | 7 | 3 | 3 | 4 | 3 | 5 | 2 | 3 | Delhi/CAS |
| 144 | DRD479 | 2 | 4 | 2 | 2 | 3 | 6 | 4 | 4 | 2 | 2 | 4 | 4 | 4 | 2 | 6 | 1 | 7 | 3 | 3 | 4 | 4 | 4 | 4 | 2 | Delhi/CAS |
| 145 | DRD48  | 2 | 3 | 2 | 2 | 3 | 6 | 2 | 3 | 2 | 2 | 4 | 4 | 2 | 2 | 5 | 1 | 7 | 3 | 3 | 5 | 3 | 2 | 2 | 3 | Delhi/CAS |
| 146 | DRD486 | 2 | 3 | 2 | 2 | 3 | 6 | 2 | 4 | 2 | 2 | 4 | 4 | 2 | 2 | 5 | 1 | 7 | 3 | 3 | 5 | 3 | 2 | 2 | 3 | Delhi/CAS |
| 147 | DRD489 | 2 | 3 | 2 | 2 | 3 | 5 | 2 | 4 | 2 | 7 | 4 | 4 | 2 | 2 | 5 | 1 | 4 | 3 | 3 | 5 | 3 | 8 | 3 | 2 | Delhi/CAS |
| 148 | DRD490 | 2 | 3 | 2 | 2 | 4 | 6 | 2 | 4 | 2 | 2 | 4 | 4 | 2 | 2 | 5 | 1 | 7 | 3 | 3 | 5 | 3 | 2 | 4 | 3 | Delhi/CAS |
| 149 | DRD491 | 2 | 5 | 2 | 2 | 3 | 5 | 4 | 4 | 2 | 6 | 4 | 4 | 2 | 2 | 5 | 1 | 4 | 3 | 3 | 5 | 3 | 7 | 4 | 3 | Delhi/CAS |
| 150 | DRD496 | 2 | 3 | 2 | 2 | 3 | 6 | 2 | 4 | 2 | 2 | 4 | 4 | 2 | 1 | 5 | 1 | 7 | 2 | 3 | 5 | 3 | 5 | 2 | 3 | Delhi/CAS |
| 151 | DRD50  | 2 | 4 | 2 | 2 | 3 | 6 | 4 | 4 | 2 | 2 | 3 | 4 | 2 | 2 | 4 | 1 | 7 | 3 | 3 | 4 | 3 | 8 | 4 | 3 | Delhi/CAS |
| 152 | DRD501 | 2 | 3 | 2 | 2 | 3 | 6 | 2 | 4 | 2 | 2 | 4 | 4 | 2 | 1 | 5 | 1 | 7 | 3 | 3 | 5 | 3 | 2 | 2 | 2 | Delhi/CAS |
| 153 | DRD503 | 2 | 3 | 2 | 2 | 4 | 6 | 2 | 4 | 2 | 2 | 4 | 4 | 2 | 2 | 5 | 1 | 7 | 3 | 3 | 5 | 3 | 2 | 4 | 3 | Delhi/CAS |
| 154 | DRD514 | 2 | 4 | 2 | 2 | 3 | 6 | 4 | 4 | 2 | 2 | 4 | 4 | 2 | 1 | 4 | 2 | 8 | 3 | 3 | 3 | 3 | 7 | 4 | 3 | Delhi/CAS |
| 155 | DRD521 | 2 | 4 | 2 | 2 | 3 | 5 | 4 | 4 | 2 | 2 | 3 | 4 | 2 | 2 | 4 | 1 | 8 | 3 | 3 | 4 | 3 | 8 | 4 | 3 | Delhi/CAS |
| 156 | DRD522 | 2 | 5 | 2 | 2 | 3 | 3 | 3 | 4 | 2 | 6 | 4 | 4 | 1 | 2 | 5 | 1 | 4 | 3 | 3 | 5 | 3 | 8 | 4 | 3 | Delhi/CAS |
| 157 | DRD524 | 2 | 3 | 2 | 2 | 3 | 6 | 2 | 4 | 2 | 2 | 4 | 4 | 2 | 2 | 5 | 1 | 7 | 3 | 3 | 3 | 3 | 2 | 2 | 3 | Delhi/CAS |
| 158 | DRD532 | 2 | 5 | 3 | 2 | 3 | 3 | 3 | 4 | 2 | 6 | 4 | 4 | 1 | 1 | 5 | 1 | 5 | 3 | 3 | 5 | 3 | 8 | 4 | 3 | Delhi/CAS |
| 159 | DRD545 | 2 | 4 | 2 | 2 | 3 | 4 | 3 | 4 | 2 | 2 | 4 | 4 | 2 | 2 | 6 | 1 | 4 | 3 | 3 | 3 | 3 | 7 | 2 | 2 | Delhi/CAS |

|     |        |   |   |   |   |   |   |   |   |   |   |   |   |   |   |   |   |   |   |   |   |   |   |   |   |           |
|-----|--------|---|---|---|---|---|---|---|---|---|---|---|---|---|---|---|---|---|---|---|---|---|---|---|---|-----------|
| 160 | DRD552 | 2 | 3 | 2 | 2 | 3 | 6 | 2 | 4 | 2 | 2 | 4 | 4 | 2 | 2 | 5 | 1 | 7 | 2 | 3 | 5 | 3 | 5 | 2 | 3 | Delhi/CAS |
| 161 | DRD566 | 2 | 3 | 2 | 2 | 3 | 6 | 2 | 4 | 2 | 2 | 4 | 4 | 2 | 1 | 4 | 1 | 7 | 3 | 3 | 5 | 3 | 2 | 2 | 2 | Delhi/CAS |
| 162 | DRD577 | 2 | 4 | 2 | 2 | 3 | 5 | 4 | 4 | 2 | 2 | 4 | 4 | 2 | 2 | 4 | 1 | 8 | 3 | 3 | 3 | 3 | 7 | 4 | 3 | Delhi/CAS |
| 163 | DRD578 | 2 | 5 | 2 | 2 | 3 | 5 | 2 | 4 | 2 | 2 | 4 | 4 | 2 | 2 | 6 | 1 | 7 | 3 | 3 | 5 | 2 | 8 | 3 | 2 | Delhi/CAS |
| 164 | DRD590 | 2 | 3 | 2 | 2 | 3 | 6 | 2 | 4 | 2 | 1 | 4 | 4 | 2 | 2 | 5 | 1 | 7 | 3 | 3 | 5 | 3 | 2 | 2 | 3 | Delhi/CAS |
| 165 | DRD592 | 2 | 5 | 2 | 2 | 3 | 5 | 4 | 4 | 2 | 6 | 4 | 4 | 2 | 2 | 5 | 1 | 7 | 3 | 3 | 5 | 3 | 8 | 4 | 3 | Delhi/CAS |
| 166 | DRD593 | 2 | 5 | 2 | 2 | 3 | 5 | 2 | 4 | 2 | 2 | 4 | 4 | 2 | 2 | 6 | 1 | 7 | 3 | 3 | 5 | 2 | 7 | 3 | 2 | Delhi/CAS |
| 167 | DRD597 | 2 | 4 | 2 | 2 | 5 | 6 | 4 | 4 | 2 | 2 | 4 | 4 | 2 | 2 | 5 | 1 | 5 | 3 | 3 | 4 | 3 | 7 | 5 | 2 | Delhi/CAS |
| 168 | DRD600 | 2 | 5 | 2 | 2 | 3 | 5 | 4 |   | 2 | 2 | 4 | 4 | 2 | 2 | 5 | 1 | 7 | 3 | 3 | 4 | 3 | 1 | 2 | 3 | Delhi/CAS |
| 169 | DRD605 | 2 | 3 | 2 | 2 | 3 | 5 | 2 | 4 | 2 | 7 | 4 | 4 | 1 | 2 | 5 | 1 | 6 | 3 | 3 | 5 | 3 | 8 | 3 | 2 | Delhi/CAS |
| 170 | DRD608 | 2 | 3 | 2 | 2 | 3 | 6 | 2 | 4 | 2 | 7 | 4 | 4 | 2 | 2 | 6 | 1 | 7 | 3 | 3 | 5 | 3 | 7 | 3 | 2 | Delhi/CAS |
| 171 | DRD615 | 2 | 3 | 2 | 2 | 3 | 6 | 2 | 4 | 2 | 7 | 4 | 4 | 1 | 2 | 5 | 1 | 7 | 3 | 3 | 5 | 3 | 8 | 3 | 2 | Delhi/CAS |
| 172 | DRD627 | 2 | 3 | 2 | 2 | 3 | 6 | 2 | 4 | 2 | 2 | 4 | 4 | 2 | 2 | 5 | 1 | 7 | 3 | 3 | 4 | 3 | 2 | 3 | 3 | Delhi/CAS |
| 173 | DRD632 | 2 | 2 | 2 | 2 | 3 | 5 | 2 | 4 | 2 | 7 | 4 | 4 | 2 | 2 | 6 | 1 | 7 | 3 | 3 | 5 | 3 | 8 | 3 | 2 | Delhi/CAS |
| 174 | DRD640 | 2 | 3 | 2 | 2 | 3 | 6 | 2 | 4 | 2 | 7 | 4 | 4 | 2 | 2 | 5 | 1 | 7 | 3 | 3 | 5 | 3 | 7 | 3 | 2 | Delhi/CAS |
| 175 | DRD641 | 2 | 3 | 2 | 2 | 4 | 5 | 2 | 4 | 2 | 7 | 4 | 4 | 2 | 2 | 5 | 1 | 7 | 3 | 3 | 5 | 3 | 8 | 3 | 2 | Delhi/CAS |
| 176 | DRD645 | 2 | 3 | 2 | 2 | 3 | 6 | 2 | 4 | 2 | 2 | 4 | 4 | 2 | 2 | 5 | 1 | 7 | 3 | 3 | 5 | 3 | 5 | 4 | 3 | Delhi/CAS |
| 177 | DRD648 | 2 | 3 | 2 | 2 | 3 | 5 | 2 | 4 | 2 | 7 | 4 | 4 | 2 | 2 | 5 | 1 | 7 | 3 | 3 | 5 | 3 | 7 | 3 | 2 | Delhi/CAS |
| 178 | DRD651 | 2 | 5 | 2 | 2 | 3 | 5 | 2 | 4 | 2 | 2 | 4 | 4 | 2 | 2 | 6 | 1 | 7 | 3 | 3 | 5 | 2 | 8 | 3 | 2 | Delhi/CAS |
| 179 | DRD655 | 2 | 3 | 2 | 2 | 3 | 6 | 2 | 4 | 2 | 7 | 4 | 4 | 2 | 2 | 5 | 1 | 7 | 3 | 3 | 5 | 3 | 8 | 3 | 2 | Delhi/CAS |
| 180 | DRD661 | 2 | 4 | 2 | 2 | 3 | 5 | 4 | 4 | 2 | 2 | 4 | 4 | 2 | 2 | 4 | 1 | 8 | 3 | 3 | 4 | 3 | 8 | 4 | 3 | Delhi/CAS |
| 181 | DRD666 | 2 | 4 | 2 | 2 | 3 | 5 | 4 | 4 | 2 | 2 | 4 | 4 | 2 | 2 | 4 | 1 | 8 | 3 | 3 | 4 | 3 | 8 | 4 | 3 | Delhi/CAS |
| 182 | DRD67  | 2 | 3 | 2 | 2 | 3 | 6 | 2 | 4 | 2 | 2 | 4 | 4 | 2 | 2 | 5 | 1 | 7 | 3 | 3 | 5 | 3 | 2 | 4 | 3 | Delhi/CAS |
| 183 | DRD671 | 2 | 3 | 2 | 2 | 3 | 5 | 2 | 4 | 2 | 7 | 4 | 4 | 1 | 2 | 5 | 1 | 7 | 3 | 3 | 5 | 3 | 8 | 3 | 2 | Delhi/CAS |
| 184 | DRD673 | 2 | 3 | 2 | 2 | 4 | 6 | 2 | 4 | 2 | 7 | 4 | 4 | 2 | 2 | 5 | 1 | 7 | 3 | 3 | 5 | 3 | 7 | 3 | 2 | Delhi/CAS |
| 185 | DRD679 | 2 | 3 | 2 | 2 | 3 | 6 | 2 | 4 | 2 | 2 | 4 | 4 | 2 | 2 | 5 | 1 | 7 | 3 | 3 | 4 | 2 | 2 | 2 | 3 | Delhi/CAS |
| 186 | DRD684 | 2 | 3 | 2 | 2 | 4 | 5 | 2 | 4 | 2 | 7 | 4 | 4 | 2 | 2 | 6 | 1 | 7 | 3 | 3 | 5 | 3 | 8 | 3 | 2 | Delhi/CAS |
| 187 | DRD691 | 2 | 3 | 2 | 2 | 3 | 6 | 2 | 4 | 2 | 7 | 4 | 4 | 1 | 2 | 5 | 1 | 7 | 3 | 3 | 5 | 3 | 7 | 3 | 2 | Delhi/CAS |
| 188 | DRD694 | 2 | 3 | 2 | 2 | 3 | 5 | 2 | 4 | 2 | 7 | 4 | 4 | 3 | 2 | 5 | 1 | 7 | 3 | 3 | 5 | 3 | 7 | 3 | 2 | Delhi/CAS |
| 189 | DRD695 | 2 | 3 | 2 | 2 | 3 | 6 | 2 | 4 | 2 | 7 | 4 | 4 | 2 | 2 | 5 | 1 | 7 | 3 | 3 | 5 | 3 | 8 | 3 | 2 | Delhi/CAS |
| 190 | DRD698 | 2 | 3 | 2 | 2 | 3 | 6 | 2 | 4 | 2 | 2 | 4 | 4 | 2 | 2 | 5 | 1 | 7 | 3 | 3 | 5 | 3 | 2 | 4 | 3 | Delhi/CAS |
| 191 | DRD7   | 2 | 3 | 2 | 2 | 3 | 6 | 2 | 3 | 2 | 2 | 4 | 4 | 2 | 2 | 5 | 1 | 7 | 3 | 3 | 5 | 3 | 5 | 2 | 3 | Delhi/CAS |
| 192 | DRD73  | 2 | 4 | 2 | 2 | 3 | 5 | 4 | 4 | 2 | 2 | 4 | 4 | 2 | 2 | 4 | 1 | 8 | 3 | 3 | 4 | 3 | 8 | 4 | 3 | Delhi/CAS |
| 193 | DRD75  | 2 | 3 | 2 | 2 | 3 | 6 | 2 | 4 | 2 | 2 | 4 | 4 | 2 | 2 | 5 | 1 | 7 | 2 | 3 | 5 | 3 | 2 | 2 | 3 | Delhi/CAS |
| 194 | DRD81  | 2 | 5 | 2 | 2 | 3 | 5 | 2 | 4 | 2 | 2 | 4 | 4 | 2 | 2 | 6 | 1 | 7 | 3 | 3 | 5 | 2 | 8 | 3 | 2 | Delhi/CAS |
| 195 | DRD83  | 2 | 3 | 2 | 2 | 3 | 6 | 2 | 4 | 2 | 2 | 4 | 4 | 2 | 2 | 5 | 1 | 7 | 3 | 3 | 5 | 3 | 5 | 4 | 3 | Delhi/CAS |
| 196 | DRD9   | 2 | 3 | 2 | 2 | 3 | 6 | 2 | 3 | 2 | 2 | 4 | 4 | 2 | 2 | 5 | 1 | 7 | 2 | 3 | 5 | 3 | 2 | 2 | 3 | Delhi/CAS |
| 197 | DRD1   | 2 | 2 | 4 | 5 | 3 | 4 | 2 | 5 | 2 | 2 | 7 | 3 | 2 | 5 | 5 | 2 | 2 | 3 | 3 | 4 | 4 | 5 | 1 | 3 | EAI       |
| 198 | DRD106 | 2 | 1 | 4 | 5 | 2 | 4 | 9 | 9 | 2 | 8 | 4 | 3 | 2 | 6 | 6 | 2 | 2 | 3 | 3 | 4 | 2 | 7 | 1 | 3 | EAI       |
| 199 | DRD107 | 2 | 1 | 4 | 5 | 2 | 4 | 9 | a | 2 | 9 | 4 | 3 | 2 | 6 | 6 | 2 | 2 | 3 | 3 | 4 | 2 | 7 | 1 | 3 | EAI       |

|     |        |   |   |   |   |   |   |   |   |   |   |   |   |   |   |   |   |   |   |   |   |   |   |   |   |     |
|-----|--------|---|---|---|---|---|---|---|---|---|---|---|---|---|---|---|---|---|---|---|---|---|---|---|---|-----|
| 200 | DRD109 | 2 | 2 | 4 | 5 | 3 | 4 | 3 | 5 | 2 | 3 | 4 | 3 | 1 | 5 | 6 | 2 | 2 | 3 | 3 | 6 | 4 | 5 | 1 | 2 | EAI |
| 201 | DRD117 | 2 | 2 | 4 | 5 | 4 | 4 | 3 | 6 | 2 | 3 | 6 | 3 | 1 | 1 | 6 | 2 | 2 | 3 | 3 | 4 | 4 | 6 | 1 | 3 | EAI |
| 202 | DRD118 | 2 | 2 | 4 | 5 | 4 | 4 | 3 | 6 | 2 | 3 | 6 | 3 | 1 | 1 | 4 | 2 | 2 | 3 | 3 | 4 | 4 | 5 | 1 | 3 | EAI |
| 203 | DRD12  | 2 | 2 | 4 | 5 | 3 | 4 | 3 | 5 | 2 | 2 | 6 | 3 | 1 | 4 | 6 | 2 | 2 | 3 | 3 | 5 | 4 | 6 | 1 | 3 | EAI |
| 204 | DRD121 | 2 | 2 | 4 | 5 | 3 | 4 | 3 | 5 | 2 | 2 | 7 | 3 | 2 | 6 | 5 | 2 | 2 | 3 | 3 | 4 | 4 | 5 | 1 | 3 | EAI |
| 205 | DRD126 | 2 | 1 | 4 | 5 | 2 | 4 | 9 | 9 | 2 | 8 | 4 | 3 | 2 | 6 | 6 | 2 | 2 | 3 | 3 | 4 | 2 | 7 | 1 | 3 | EAI |
| 206 | DRD13  | 2 | 1 | 4 | 5 | 2 | 4 | 9 | 9 | 2 | 9 | 4 | 3 | 2 | 6 | 6 | 2 | 2 | 3 | 3 | 4 | 2 | 7 | 1 | 3 | EAI |
| 207 | DRD135 | 2 | 2 | 4 | 5 | 3 | 4 | 3 | 5 | 2 | 3 | 8 | 3 | 1 | 3 | 7 | 2 | 2 | 3 | 3 | 6 | 5 | 5 | 1 | 3 | EAI |
| 208 | DRD138 | 2 | 1 | 4 | 3 | 2 | 4 | 3 | 3 | 2 | 3 | 4 | 3 | 2 | 6 | 6 | 2 | 2 | 3 | 3 | 4 | 2 | 1 | 1 | 3 | EAI |
| 209 | DRD148 | 2 | 1 | 4 | 5 | 2 | 4 | 3 | 9 | 2 | 9 | 6 | 3 | 2 | 6 | 6 | 2 | 2 | 3 | 3 | 3 | 2 | 7 | 1 | 3 | EAI |
| 210 | DRD150 | 2 | 2 | 4 | 5 | 3 | 4 | 3 | 5 | 2 | 3 | 4 | 3 | 1 | 3 | 6 | 2 | 2 | 3 | 3 | 6 | 4 | 5 | 1 | 3 | EAI |
| 211 | DRD151 | 2 | 1 | 4 | 5 | 2 | 4 | 9 | a | 2 | 8 | 4 | 3 | 2 | 6 | 6 | 2 | 2 | 3 | 3 | 4 | 2 | 7 | 1 | 3 | EAI |
| 212 | DRD152 | 2 | 1 | 4 | 5 | 2 | 4 | 3 | 9 | 2 | 9 | 8 | 3 | 2 | 3 | 7 | 1 | 2 | 3 | 3 | 3 | 2 | 7 | 1 | 3 | EAI |
| 213 | DRD16  | 2 | 2 | 2 | 5 | 3 | 4 | 3 | 7 | 2 | 3 | 4 | 3 | 2 | 2 | 6 | 2 | 2 | 3 | 3 | 5 | 4 | 4 | 1 | 1 | EAI |
| 214 | DRD175 | 2 | 1 | 4 | 5 | 2 | 4 | 9 | 9 | 2 | 8 | 4 | 3 | 2 | 6 | 6 | 2 | 2 | 3 | 3 | 4 | 2 | 7 | 1 | 3 | EAI |
| 215 | DRD18  | 2 | 1 | 4 | 5 | 2 | 4 | 9 | a | 2 | 9 | 4 | 3 | 2 | 6 | 6 | 2 | 2 | 3 | 3 | 4 | 2 | 7 | 1 | 3 | EAI |
| 216 | DRD183 | 2 | 1 | 4 | 8 | 2 | 4 | 3 | a | 2 | 9 | 4 | 3 | 2 | 5 | 4 | 2 | 2 | 3 | 3 | 3 | 2 | 7 | 1 | 3 | EAI |
| 217 | DRD187 | 2 | 2 | 4 | 5 | 2 | 4 | 3 | 4 | 2 | 4 | 9 | 3 | 2 | 4 | 7 | 2 | 3 | 3 | 3 | 5 | 7 | 6 | 1 | 3 | EAI |
| 218 | DRD188 | 2 | 2 | 4 | 4 | 4 | 4 | 3 | 6 | 2 | 2 | 6 | 3 | 1 | 2 | 6 | 2 | 1 | 3 | 3 | 5 | 4 | 4 | 1 | 3 | EAI |
| 219 | DRD189 | 2 | 2 | 4 | 4 | 3 | 4 | 1 | 5 | 2 | 2 | 7 | 3 | 3 | 5 | 5 | 1 | 2 | 3 | 3 | 5 | 2 | 6 | 1 | 2 | EAI |
| 220 | DRD190 | 2 | 2 | 4 | 5 | 3 | 4 | 3 | 5 | 2 | 3 | 4 | 3 | 1 | 3 | 6 | 2 | 2 | 3 | 3 | 6 | 5 | 5 | 1 | 2 | EAI |
| 221 | DRD191 | 2 | 2 | 4 | 5 | 3 | 4 | 3 | 5 | 2 | 2 | 7 | 3 | 2 | 5 | 5 | 2 | 2 | 3 | 3 | 4 | 4 | 5 | 1 | 3 | EAI |
| 222 | DRD194 | 2 | 2 | 4 | 5 | 3 | 4 | 2 | 5 | 2 | 2 | 7 | 3 | 2 | 5 | 5 | 2 | 2 | 3 | 3 | 4 | 4 | 5 | 1 | 3 | EAI |
| 223 | DRD195 | 2 | 2 | 4 | 5 | 3 | 4 | 2 | 5 | 2 | 2 | 7 | 3 | 2 | 5 | 5 | 2 | 2 | 3 | 3 | 4 | 4 | 5 | 1 | 3 | EAI |
| 224 | DRD198 | 2 | 2 | 4 | 5 | 4 | 4 | 3 | 6 | 2 | 3 | 6 | 3 | 1 | 1 | 4 | 2 | 2 | 3 | 3 | 4 | 4 | 5 | 1 | 3 | EAI |
| 225 | DRD200 | 2 | 1 | 4 | 5 | 2 | 4 | 3 | 5 | 2 | 8 | 4 | 3 | 2 | 6 | 6 | 2 | 2 | 3 | 3 | 4 | 2 | 7 | 1 | 2 | EAI |
| 226 | DRD210 | 2 | 2 | 4 | 5 | 3 | 4 | 3 | 6 | 2 | 3 | 6 | 3 | 1 | 1 | 6 | 2 | 2 | 3 | 3 | 6 | 6 | 5 | 1 | 2 | EAI |
| 227 | DRD216 | 2 | 2 | 4 | 4 | 3 | 4 | 3 | 5 | 2 | 2 | 6 | 3 | 1 | 4 | 6 | 1 | 2 | 3 | 3 | 5 | 4 | 6 | 1 | 3 | EAI |
| 228 | DRD219 | 2 | 1 | 4 | 5 | 2 | 4 | 3 | 5 | 2 | 8 | 4 | 3 | 2 | 6 | 6 | 2 | 2 | 3 | 3 | 4 | 2 | 7 | 1 | 2 | EAI |
| 229 | DRD220 | 2 | 2 | 4 | 5 | 2 | 4 | 3 | 4 | 2 | 2 | 9 | 3 | 2 | 4 | 7 | 2 | 3 | 3 | 3 | 5 | 7 | 6 | 1 | 3 | EAI |
| 230 | DRD222 | 2 | 1 | 4 | 5 | 2 | 4 | 3 | 5 | 2 | 8 | 4 | 3 | 2 | 6 | 6 | 2 | 2 | 3 | 3 | 4 | 2 | 7 | 1 | 2 | EAI |
| 231 | DRD224 | 2 | 2 | 2 | 5 | 3 | 4 | 3 | a | 2 | 6 | 9 | 3 | 2 | 4 | 6 | 2 | 2 | 3 | 3 | 4 | 5 | 4 | 1 | 1 | EAI |
| 232 | DRD229 | 2 | 1 | 4 | 5 | 2 | 4 | 3 | 5 | 2 | 8 | 4 | 3 | 2 | 6 | 6 | 2 | 2 | 3 | 3 | 4 | 2 | 7 | 1 | 2 | EAI |
| 233 | DRD235 | 2 | 2 | 4 | 5 | 4 | 4 | 3 | 6 | 2 | 3 | 6 | 3 | 1 | 1 | 4 | 2 | 2 | 3 | 3 | 4 | 4 | 5 | 1 | 3 | EAI |
| 234 | DRD241 | 2 | 2 | 2 | 5 | 4 | 4 | 3 | 6 | 2 | 3 | 6 | 3 | 1 | 1 | 4 | 2 | 2 | 3 | 3 | 4 | 4 | 5 | 1 | 3 | EAI |
| 235 | DRD245 | 2 | 1 | 4 | 5 | 2 | 4 | 3 | 5 | 2 | 8 | 4 | 3 | 2 | 6 | 6 | 2 | 2 | 3 | 3 | 4 | 2 | 7 | 1 | 2 | EAI |
| 236 | DRD247 | 2 | 1 | 4 | 5 | 2 | 4 | 3 | 5 | 2 | 8 | 4 | 3 | 2 | 6 | 6 | 2 | 2 | 3 | 3 | 4 | 2 | 7 | 1 | 2 | EAI |
| 237 | DRD253 | 2 | 1 | 4 | 5 | 2 | 4 | 3 | 5 | 2 | 8 | 4 | 3 | 2 | 6 | 6 | 2 | 2 | 3 | 3 | 4 | 2 | 7 | 1 | 2 | EAI |
| 238 | DRD257 | 2 | 2 | 4 | 4 | 3 | 4 | 3 | 8 | 2 | 3 | 6 | 3 | 1 | 3 | 6 | 2 | 2 | 3 | 2 | 6 | 2 | 6 | 1 | 3 | EAI |
| 239 | DRD258 | 2 | 1 | 4 | 5 | 2 | 4 | 9 | 9 | 2 | 8 | 4 | 3 | 2 | 6 | 6 | 2 | 2 | 3 | 3 | 4 | 2 | 7 | 1 | 3 | EAI |

|     |        |   |   |   |   |   |   |   |   |   |   |   |   |   |   |   |   |   |   |   |   |   |   |   |   |     |
|-----|--------|---|---|---|---|---|---|---|---|---|---|---|---|---|---|---|---|---|---|---|---|---|---|---|---|-----|
| 240 | DRD259 | 2 | 1 | 4 | 5 | 2 | 4 | 3 | 5 | 2 | 8 | 4 | 3 | 2 | 6 | 6 | 2 | 2 | 3 | 3 | 4 | 2 | 7 | 1 | 2 | EAI |
| 241 | DRD26  | 2 | 1 | 4 | 5 | 2 | 3 | 3 | a | 2 | 9 | 4 | 3 | 2 | 6 | 6 | 2 | 2 | 3 | 3 | 4 | 2 | 7 | 1 | 3 | EAI |
| 242 | DRD273 | 2 | 1 | 4 | 5 | 2 | 4 | 3 | 5 | 2 | 8 | 4 | 3 | 2 | 6 | 6 | 2 | 2 | 3 | 3 | 4 | 2 | 7 | 1 | 2 | EAI |
| 243 | DRD274 | 2 | 1 | 4 | 5 | 2 | 4 | 3 | 5 | 2 | 8 | 4 | 3 | 2 | 6 | 6 | 2 | 2 | 3 | 3 | 4 | 2 | 7 | 1 | 2 | EAI |
| 244 | DRD275 | 2 | 1 | 4 | 5 | 2 | 4 | 3 | 5 | 2 | 8 | 4 | 3 | 2 | 6 | 6 | 2 | 2 | 3 | 3 | 4 | 2 | 7 | 1 | 2 | EAI |
| 245 | DRD278 | 2 | 1 | 4 | 5 | 2 | 4 | 3 | 5 | 2 | 8 | 4 | 3 | 2 | 6 | 6 | 2 | 2 | 3 | 3 | 4 | 2 | 7 | 1 | 2 | EAI |
| 246 | DRD279 | 2 | 1 | 4 | 5 | 2 | 4 | 3 | 5 | 2 | 8 | 4 | 3 | 2 | 6 | 6 | 2 | 2 | 3 | 3 | 4 | 2 | 7 | 1 | 2 | EAI |
| 247 | DRD290 | 2 | 2 | 4 | 5 | 3 | 4 | 3 | 6 | 2 | 3 | 6 | 3 | 1 | 1 | 4 | 2 | 2 | 3 | 3 | 4 | 4 | 5 | 1 | 3 | EAI |
| 248 | DRD291 | 2 | 1 | 4 | 5 | 2 | 4 | 3 | 5 | 2 | 8 | 4 | 3 | 2 | 6 | 6 | 2 | 2 | 3 | 3 | 4 | 2 | 7 | 1 | 2 | EAI |
| 249 | DRD293 | 2 | 1 | 4 | 5 | 2 | 4 | 3 | 5 | 2 | 8 | 4 | 3 | 2 | 6 | 6 | 2 | 2 | 3 | 3 | 4 | 2 | 7 | 1 | 2 | EAI |
| 250 | DRD300 | 2 | 1 | 4 | 5 | 2 | 4 | 3 | 5 | 2 | 8 | 4 | 3 | 2 | 6 | 6 | 2 | 2 | 3 | 3 | 4 | 2 | 7 | 1 | 2 | EAI |
| 251 | DRD306 | 2 | 2 | 4 | 5 | 3 | 4 | 3 | 6 | 2 | 3 | 6 | 3 | 1 | 1 | 4 | 2 | 2 | 3 | 3 | 6 | 4 | 5 | 1 | 3 | EAI |
| 252 | DRD307 | 2 | 3 | 4 | 5 | 2 | 4 | 3 | 6 | 2 | 5 | 6 | 3 | 1 | 4 | 6 | 2 | 2 | 3 | 3 | 5 | 2 | 6 | 1 | 3 | EAI |
| 253 | DRD312 | 2 | 1 | 4 | 5 | 2 | 4 | 3 | 5 | 2 | 8 | 4 | 3 | 2 | 6 | 6 | 2 | 2 | 3 | 3 | 4 | 2 | 7 | 1 | 2 | EAI |
| 254 | DRD324 | 2 | 2 | 4 | 5 | 4 | 4 | 3 | 6 | 2 | 3 | 6 | 3 | 1 | 1 | 6 | 2 | 2 | 3 | 3 | 4 | 4 | 5 | 1 | 2 | EAI |
| 255 | DRD330 | 2 | 1 | 4 | 5 | 2 | 4 | 3 | 5 | 2 | 8 | 4 | 3 | 2 | 6 | 6 | 2 | 2 | 3 | 3 | 4 | 2 | 7 | 1 | 2 | EAI |
| 256 | DRD34  | 2 | 2 | 4 | 5 | 3 | 4 | 2 | 5 | 1 | 2 | 7 | 3 | 3 | 5 | 1 | 2 | 2 | 3 | 3 | 5 | 6 | 6 | 1 | 3 | EAI |
| 257 | DRD342 | 2 | 2 | 4 | 5 | 3 | 4 | 3 | 6 | 2 | 3 | 6 | 3 | 1 | 1 | 4 | 2 | 2 | 3 | 3 | 6 | 6 | 5 | 1 | 3 | EAI |
| 258 | DRD345 | 2 | 2 | 4 | 5 | 4 | 4 | 3 | 6 | 2 | 2 | 6 | 3 | 1 | 1 | 7 | 2 | 2 | 3 | 3 | 4 | 4 | 6 | 1 | 3 | EAI |
| 259 | DRD346 | 2 | 2 | 2 | 5 | 3 | 4 | 3 | 9 | 2 | 8 | 7 | 3 | 2 | 2 | 7 | 2 | 2 | 3 | 3 | 6 | 2 | 4 | 1 | 1 | EAI |
| 260 | DRD347 | 2 | 1 | 4 | 5 | 2 | 4 | 3 | 5 | 2 | 8 | 4 | 3 | 2 | 6 | 6 | 2 | 2 | 3 | 3 | 4 | 2 | 7 | 1 | 2 | EAI |
| 261 | DRD356 | 2 | 3 | 4 | 5 | 2 | 4 | 3 | 6 | 2 | 5 | 6 | 3 | 1 | 4 | 6 | 2 | 2 | 3 | 3 | 5 | 2 | 6 | 1 | 3 | EAI |
| 262 | DRD36  | 2 | 1 | 4 | 5 | 2 | 4 | 9 | a | 2 | 9 | 4 | 3 | 2 | 6 | 6 | 2 | 2 | 3 | 3 | 4 | 2 | 7 | 1 | 3 | EAI |
| 263 | DRD360 | 2 | 3 | 2 | 5 | 3 | 5 | 3 | 8 | 2 | 2 | 9 | 3 | 2 | 4 | 6 | 2 | 2 | 3 | 3 | 5 | 5 | 4 | 1 | 1 | EAI |
| 264 | DRD362 | 2 | 3 | 4 | 5 | 3 | 4 | 3 | 6 | 2 | 5 | 6 | 3 | 2 | 4 | 6 | 2 | 2 | 3 | 3 | 5 | 2 | 6 | 1 | 3 | EAI |
| 265 | DRD374 | 2 | 1 | 4 | 5 | 2 | 4 | 3 | 5 | 2 | 8 | 4 | 3 | 2 | 6 | 6 | 2 | 2 | 3 | 3 | 4 | 2 | 7 | 1 | 2 | EAI |
| 266 | DRD375 | 2 | 2 | 4 | 5 | 4 | 4 | 3 | 6 | 2 | 3 | 6 | 3 | 2 | 1 | 6 | 2 | 2 | 3 | 3 | 4 | 3 | 6 | 5 | 3 | EAI |
| 267 | DRD387 | 2 | 1 | 4 | 5 | 2 | 4 | 3 | 5 | 2 | 8 | 4 | 3 | 2 | 6 | 6 | 2 | 2 | 3 | 3 | 4 | 2 | 7 | 1 | 2 | EAI |
| 268 | DRD388 | 2 | 2 | 4 | 5 | 4 | 4 | 3 | 6 | 2 | 3 | 6 | 3 | 1 | 1 | 6 | 2 | 2 | 3 | 3 | 4 | 6 | 5 | 1 | 3 | EAI |
| 269 | DRD390 | 2 | 2 | 4 | 5 | 4 | 4 | 3 | 6 | 2 | 3 | 6 | 3 | 1 | 1 | 6 | 2 | 2 | 3 | 3 | 4 | 4 | 5 | 1 | 3 | EAI |
| 270 | DRD392 | 2 | 2 | 4 | 6 | 4 | 4 | 3 | 6 | 2 | 3 | 6 | 3 | 1 | 1 | 6 | 2 | 2 | 3 | 3 | 4 | 1 | 6 | 1 | 3 | EAI |
| 271 | DRD395 | 2 | 2 | 4 | 7 | 2 | 4 | 2 | 4 | 2 | 4 | 5 | 3 | 2 | 6 | 6 | 2 | 2 | 3 | 3 | 5 | 2 | 7 | 1 | 2 | EAI |
| 272 | DRD398 | 2 | 1 | 4 | 5 | 2 | 4 | 3 | a | 2 | 9 | 4 | 3 | 2 | 5 | 6 | 2 | 2 | 3 | 3 | 3 | 2 | 7 | 2 | 2 | EAI |
| 273 | DRD4   | 2 | 2 | 4 | 3 | 3 | 4 | 2 | 6 | 2 | 6 | 9 | 3 | 2 | 5 | 5 | 2 | 2 | 1 | 3 | 5 | 4 | 1 | 1 | 3 | EAI |
| 274 | DRD406 | 2 | 2 | 4 | 5 | 3 | 4 | 3 | 4 | 2 | 2 | 7 | 3 | 2 | 5 | 5 | 2 | 2 | 3 | 3 | 4 | 4 | 5 | 1 | 3 | EAI |
| 275 | DRD419 | 2 | 2 | 4 | 4 | 2 | 5 | 3 | 6 | 2 | 9 | 8 | 3 | 2 | 4 | 6 | 2 | 2 | 1 | 3 | 4 | 4 | 5 | 1 | 3 | EAI |
| 276 | DRD420 | 2 | 2 | 4 | 5 | 3 | 4 | 3 | 5 | 2 | 2 | 7 | 3 | 2 | 5 | 5 | 2 | 2 | 3 | 3 | 4 | 4 | 5 | 1 | 3 | EAI |
| 277 | DRD424 | 2 | 2 | 4 | 5 | 4 | 4 | 3 | 6 | 2 | 3 | 6 | 3 | 1 | 1 | 4 | 2 | 2 | 3 | 3 | 6 | 4 | 5 | 1 | 3 | EAI |
| 278 | DRD43  | 2 | 1 | 4 | 5 | 2 | 3 | 3 | 9 | 2 | 6 | 4 | 3 | 2 | 6 | 6 | 2 | 2 | 3 | 3 | 4 | 2 | 7 | 1 | 2 | EAI |
| 279 | DRD433 | 2 | 1 | 4 | 5 | 2 | 4 | 9 | a | 2 | 9 | 4 | 3 | 2 | 6 | 6 | 2 | 2 | 3 | 3 | 4 | 2 | 7 | 1 | 3 | EAI |

|     |         |   |   |   |   |   |   |   |   |   |   |   |   |   |   |   |   |   |   |   |   |   |   |   |   |     |
|-----|---------|---|---|---|---|---|---|---|---|---|---|---|---|---|---|---|---|---|---|---|---|---|---|---|---|-----|
| 280 | DRD436  | 2 | 2 | 4 | 6 | 4 | 4 | 3 | 6 | 2 | 3 | 6 | 3 | 1 | 1 | 6 | 2 | 2 | 3 | 3 | 4 | 4 | 6 | 1 | 3 | EAI |
| 281 | DRD439  | 2 | 2 | 4 | 5 | 3 | 4 | 2 | 5 | 2 | 2 | 7 | 3 | 2 | 5 | 5 | 2 | 2 | 3 | 3 | 4 | 4 | 5 | 1 | 3 | EAI |
| 282 | DRD443  | 2 | 2 | 4 | 5 | 3 | 4 | 3 | 5 | 2 | 2 | 7 | 3 | 2 | 5 | 5 | 2 | 2 | 3 | 3 | 4 | 4 | 5 | 1 | 3 | EAI |
| 283 | DRD448  | 2 | 2 | 4 | 4 | 3 | 4 | 3 | 5 | 2 | 2 | 7 | 3 | 2 | 5 | 5 | 2 | 2 | 3 | 3 | 4 | 4 | 5 | 1 | 3 | EAI |
| 284 | DRD454  | 2 | 2 | 4 | 4 | 3 | 4 | 2 | 5 | 2 | 2 | 7 | 3 | 2 | 5 | 5 | 2 | 2 | 3 | 3 | 4 | 4 | 5 | 1 | 3 | EAI |
| 285 | DRD460  | 2 | 2 | 4 | 5 | 3 | 4 | 3 | 5 | 2 | 2 | 7 | 3 | 2 | 5 | 5 | 2 | 2 | 3 | 3 | 4 | 4 | 5 | 1 | 3 | EAI |
| 286 | DRD463  | 2 | 2 | 4 | 4 | 2 | 4 | 3 | 5 | 2 | 2 | 9 | 3 | 2 | 1 | 6 | 2 | 2 | 1 | 3 | 5 | 4 | 6 | 1 | 3 | EAI |
| 287 | DRD467  | 2 | 2 | 4 | 5 | 3 | 4 | 3 | 6 | 2 | 3 | 6 | 3 | 1 | 1 | 4 | 2 | 2 | 3 | 3 | 4 | 6 | 5 | 1 | 3 | EAI |
| 288 | DRD469  | 2 | 2 | 4 | 6 | 4 | 4 | 3 | 6 | 2 | 3 | 6 | 3 | 1 | 1 | 6 | 2 | 2 | 3 | 3 | 4 | 4 | 6 | 1 | 3 | EAI |
| 289 | DRD47   | 2 | 2 | 4 | 5 | 3 | 4 | 3 | 5 | 2 | 3 | 4 | 3 | 1 | 4 | 6 | 2 | 2 | 3 | 3 | 6 | 4 | 5 | 1 | 2 | EAI |
| 290 | DRD474  | 2 | 2 | 4 | 5 | 4 | 4 | 3 | 4 | 2 | 2 | 5 | 3 | 1 | 1 | 6 | 2 | 2 | 3 | 3 | 6 | 4 | 6 | 1 | 3 | EAI |
| 291 | DRD485  | 2 | 2 | 4 | 5 | 4 | 4 | 3 | 6 | 2 | 3 | 6 | 3 | 1 | 1 | 6 | 2 | 2 | 3 | 3 | 6 | 4 | 5 | 1 | 2 | EAI |
| 292 | DRD516  | 2 | 2 | 4 | 5 | 4 | 4 | 3 | 6 | 2 | 3 | 6 | 3 | 1 | 1 | 4 | 2 | 2 | 3 | 3 | 4 | 4 | 5 | 1 | 2 | EAI |
| 293 | DRD52   | 2 | 2 | 4 | 3 | 3 | 4 | 3 | 6 | 2 | 6 | 9 | 3 | 2 | 5 | 5 | 2 | 2 | 1 | 3 | 5 | 4 | 1 | 1 | 3 | EAI |
| 294 | DRD548  | 2 | 2 | 4 | 5 | 3 | 4 | 2 | 5 | 2 | 2 | 7 | 3 | 2 | 5 | 5 | 2 | 2 | 3 | 3 | 4 | 4 | 5 | 1 | 3 | EAI |
| 295 | DRD549  | 2 | 2 | 4 | 5 | 3 | 4 | 3 | 5 | 2 | 2 | 7 | 3 | 2 | 5 | 5 | 2 | 2 | 3 | 3 | 4 | 4 | 5 | 1 | 3 | EAI |
| 296 | DRD550  | 2 | 2 | 4 | 5 | 3 | 4 | 3 | 6 | 2 | 3 | 6 | 3 | 1 | 1 | 6 | 2 | 2 | 3 | 3 | 4 | 4 | 5 | 1 | 3 | EAI |
| 297 | DRD553  | 2 | 2 | 4 | 5 | 4 | 4 | 3 | 6 | 2 | 3 | 6 | 3 | 1 | 1 | 4 | 2 | 2 | 3 | 3 | 4 | 4 | 5 | 1 | 3 | EAI |
| 298 | DRD562  | 2 | 1 | 4 | 5 | 2 | 3 | 3 | a | 2 | 9 | 4 | 3 | 2 | 6 | 6 | 2 | 3 | 3 | 3 | 4 | 2 | 7 | 1 | 3 | EAI |
| 299 | DRD57   | 2 | 2 | 2 | 5 | 3 | 4 | 3 | 6 | 2 | 3 | 9 | 3 | 2 | 4 | 6 | 2 | 2 | 3 | 3 | 5 | 4 | 3 | 2 | 1 | EAI |
| 300 | DRD579  | 2 | 2 | 4 | 5 | 3 | 4 | 3 | 5 | 2 | 6 | 9 | 3 | 1 | 2 | 4 | 2 | 2 | 3 | 3 | 5 | 6 | 4 | 1 | 3 | EAI |
| 301 | DRD584  | 2 | 2 | 4 | 5 | 3 | 4 | 3 | 6 | 2 | 3 | 6 | 3 | 2 | 1 | 4 | 2 | 2 | 3 | 3 | 4 | 4 | 5 | 1 | 3 | EAI |
| 302 | DRD601  | 2 | 2 | 4 | 5 | 4 | 4 | 3 | 6 | 2 | 3 | 5 | 3 | 1 | 1 | 4 | 2 | 2 | 3 | 3 | 4 | 4 | 5 | 1 | 3 | EAI |
| 303 | DRD603  | 2 | 2 | 2 | 5 | 3 | 4 | 3 | 9 | 2 | 5 | 8 | 3 | 2 | 4 | 7 | 2 | 2 | 3 | 3 | 5 | 3 | 4 | 2 | 1 | EAI |
| 304 | DRD606  | 2 | 2 | 4 | 5 | 4 | 4 | 2 | 6 | 2 | 3 | 6 | 3 | 1 | 1 | 4 | 2 | 2 | 3 | 3 | 4 | 4 | 5 | 1 | 3 | EAI |
| 305 | DRD626  | 2 | 2 | 4 | 5 | 4 | 4 | 2 | 6 | 2 | 3 | 5 | 3 | 1 | 1 | 4 | 2 | 2 | 3 | 3 | 4 | 4 | 5 | 1 | 3 | EAI |
| 306 | DRD633  | 2 | 2 | 4 | 5 | 3 | 4 | 3 | 5 | 2 | 2 | 7 | 3 | 2 | 5 | 5 | 2 | 2 | 3 | 3 | 4 | 4 | 5 | 1 | 3 | EAI |
| 307 | DRD657  | 2 | 2 | 4 | 5 | 4 | 4 | 2 | 4 | 2 | 2 | 6 | 3 | 1 | 1 | 6 | 2 | 2 | 3 | 3 | 4 | 4 | 7 | 1 | 3 | EAI |
| 308 | DRD66   | 2 | 1 | 4 | 5 | 4 | 4 | 3 | 6 | 1 | b | 7 | 3 | 2 | 6 | 6 | 2 | 2 | 3 | 3 | 5 | 4 | 6 | 1 | 1 | EAI |
| 309 | DRD-660 | 2 | 2 | 4 | 5 | 4 | 4 | 3 | 6 | 2 | 3 | 6 | 3 | 1 | 1 | 4 | 2 | 2 | 3 | 3 | 6 | 6 | 5 | 1 | 3 | EAI |
| 310 | DRD662  | 2 | 2 | 4 | 5 | 3 | 4 | 3 | 5 | 2 | 2 | 7 | 3 | 2 | 5 | 5 | 2 | 2 | 3 | 3 | 4 | 4 | 5 | 1 | 3 | EAI |
| 311 | DRD668  | 2 | 2 | 4 | 5 | 3 | 4 | 3 | 6 | 2 | 3 | 6 | 3 | 1 | 1 | 6 | 2 | 2 | 3 | 3 | 6 | 4 | 6 | 1 | 2 | EAI |
| 312 | DRD669  | 2 | 2 | 4 | 5 | 4 | 3 | 3 | 6 | 2 | 3 | 6 | 3 | 1 | 1 | 6 | 2 | 2 | 3 | 3 | 4 | 4 | 5 | 1 | 3 | EAI |
| 313 | DRD69   | 2 | 2 | 4 | 5 | 3 | 4 | 3 | 5 | 2 | 2 | 6 | 3 | 1 | 4 | 7 | 2 | 2 | 3 | 3 | 6 | 4 | 6 | 1 | 2 | EAI |
| 314 | DRD697  | 2 | 2 | 4 | 5 | 3 | 4 | 3 | 5 | 2 | 2 | 7 | 3 | 2 | 5 | 5 | 2 | 2 | 3 | 3 | 4 | 4 | 5 | 1 | 3 | EAI |
| 315 | DRD702  | 2 | 2 | 2 | 3 | 3 | 4 | 3 | 3 | 2 | 2 | 9 | 3 | 2 | 4 | 6 | 2 | 2 | 3 | 3 | 5 | 4 | 4 | 1 | 1 | EAI |
| 316 | DRD71   | 2 | 2 | 4 | 4 | 4 | 4 | 3 | 6 | 2 | 3 | 6 | 3 | 1 | 1 | 6 | 2 | 2 | 3 | 3 | 4 | 4 | 4 | 1 | 3 | EAI |
| 317 | DRD757  | 2 | 2 | 2 | 5 | 2 | 4 | 3 | 6 | 2 | 3 | 9 | 3 | 2 | 4 | 6 | 2 | 2 | 3 | 3 | 5 | 4 | 3 | 2 | 1 | EAI |
| 318 | DRD79   | 2 | 2 | 2 | 5 | 3 | 4 | 3 | 6 | 2 | 3 | 9 | 3 | 2 | 4 | 6 | 2 | 2 | 3 | 3 | 5 | 4 | 3 | 1 | 1 | EAI |
| 319 | DRD8    | 2 | 2 | 4 | 5 | 3 | 4 | 3 | 6 | 2 | 3 | 6 | 3 | 1 | 1 | 6 | 2 | 2 | 3 | 3 | 4 | 4 | 5 | 1 | 3 | EAI |



|     |        |   |   |   |   |   |   |   |   |   |   |   |   |   |   |   |   |   |   |   |   |   |   |   |   |       |
|-----|--------|---|---|---|---|---|---|---|---|---|---|---|---|---|---|---|---|---|---|---|---|---|---|---|---|-------|
| 320 | DRD82  | 2 | 2 | 4 | 4 | 3 | 4 | 3 | 5 | 2 | 2 | 7 | 3 | 2 | 5 | 5 | 2 | 2 | 3 | 3 | 4 | 4 | 5 | 1 | 3 | EAI   |
| 321 | DRD92  | 2 | 2 | 4 | 3 | 3 | 4 | 3 | 6 | 2 | 6 | 8 | 3 | 2 | 5 | 5 | 2 | 2 | 1 | 4 | 5 | 4 | 6 | 1 | 3 | EAI   |
| 322 | DRD102 | 2 | 2 | 3 | 2 | 5 | 2 | 3 | 4 | 2 | 3 | 3 | 4 | 4 | 2 | 5 | 1 | 4 | 3 | 3 | 3 | 3 | 6 | 1 | 3 | Ghana |
| 323 | DRD110 | 2 | 2 | 3 | 2 | 5 | 3 | 3 | 4 | 2 | 3 | 3 | 4 | 4 | 2 | 5 | 1 | 4 | 3 | 3 | 3 | 3 | 6 | 1 | 3 | Ghana |
| 324 | DRD112 | 2 | 2 | 3 | 2 | 5 | 3 | 3 | 4 | 2 | 3 | 3 | 4 | 4 | 2 | 5 | 1 | 4 | 3 | 3 | 3 | 3 | 6 | 1 | 3 | Ghana |
| 325 | DRD115 | 2 | 2 | 3 | 2 | 5 | 3 | 3 | 4 | 2 | 4 | 3 | 4 | 4 | 2 | 5 | 1 | 4 | 3 | 3 | 3 | 3 | 6 | 1 | 3 | Ghana |
| 326 | DRD119 | 2 | 2 | 3 | 2 | 5 | 3 | 3 | 4 | 2 | 3 | 3 | 4 | 4 | 2 | 5 | 1 | 4 | 3 | 3 | 3 | 3 | 6 | 1 | 3 | Ghana |
| 327 | DRD137 | 2 | 2 | 3 | 2 | 5 | 2 | 3 | 4 | 2 | 4 | 3 | 4 | 4 | 2 | 4 | 1 | 4 | 3 | 3 | 3 | 3 | 6 | 2 | 3 | Ghana |
| 328 | DRD144 | 2 | 2 | 3 | 2 | 5 | 3 | 3 | 4 | 3 | 3 | 3 | 4 | 4 | 3 | 5 | 1 | 4 | 3 | 3 | 3 | 3 | 6 | 1 | 3 | Ghana |
| 329 | DRD147 | 2 | 2 | 5 | 2 | 5 | 3 | 3 | 4 | 2 | 4 | 3 | 4 | 4 | 2 | 5 | 1 | 4 | 3 | 3 | 3 | 3 | 6 | 1 | 3 | Ghana |
| 330 | DRD153 | 2 | 2 | 3 | 2 | 5 | 3 | 3 | 4 | 2 | 3 | 3 | 4 | 4 | 2 | 5 | 1 | 4 | 3 | 3 | 3 | 3 | 6 | 1 | 3 | Ghana |
| 331 | DRD155 | 2 | 2 | 3 | 2 | 5 | 3 | 3 | 4 | 2 | 3 | 3 | 4 | 4 | 2 | 5 | 1 | 4 | 3 | 3 | 3 | 3 | 6 | 1 | 3 | Ghana |
| 332 | DRD170 | 2 | 2 | 3 | 2 | 5 | 3 | 3 | 3 | 2 | 4 | 3 | 4 | 4 | 2 | 5 | 1 | 4 | 3 | 3 | 3 | 3 | 6 | 1 | 3 | Ghana |
| 333 | DRD203 | 2 | 2 | 3 | 2 | 5 | 3 | 3 | 4 | 2 | 3 | 2 | 4 | 4 | 1 | 5 | 1 | 4 | 3 | 3 | 3 | 3 | 6 | 1 | 3 | Ghana |
| 334 | DRD261 | 2 | 2 | 3 | 2 | 5 | 3 | 3 | 4 | 2 | 3 | 3 | 4 | 4 | 2 | 5 | 1 | 4 | 3 | 3 | 3 | 4 | 5 | 2 | 3 | Ghana |
| 335 | DRD262 | 2 | 2 | 3 | 2 | 5 | 3 | 3 | 4 | 2 | 4 | 3 | 4 | 4 | 2 | 5 | 1 | 4 | 3 | 3 | 3 | 3 | 6 | 1 | 3 | Ghana |
| 336 | DRD264 | 2 | 2 | 2 | 2 | 5 | 3 | 3 | 4 | 2 | 3 | 3 | 4 | 4 | 2 | 5 | 1 | 3 | 3 | 3 | 3 | 3 | 6 | 1 | 3 | Ghana |
| 337 | DRD265 | 2 | 2 | 3 | 2 | 5 | 3 | 3 | 4 | 2 | 4 | 3 | 4 | 4 | 2 | 5 | 1 | 4 | 3 | 3 | 3 | 3 | 6 | 1 | 3 | Ghana |
| 338 | DRD266 | 2 | 2 | 3 | 2 | 5 | 3 | 3 | 3 | 2 | 4 | 3 | 4 | 4 | 2 | 5 | 1 | 4 | 3 | 3 | 3 | 3 | 6 | 1 | 3 | Ghana |
| 339 | DRD27  | 2 | 2 | 3 | 2 | 5 | 3 | 3 | 3 | 2 | 4 | 3 | 4 | 4 | 2 | 5 | 1 | 4 | 3 | 3 | 3 | 4 | 6 | 1 | 3 | Ghana |
| 340 | DRD271 | 2 | 2 | 3 | 2 | 5 | 3 | 3 | 4 | 2 | 3 | 3 | 4 | 4 | 2 | 5 | 1 | 4 | 3 | 3 | 3 | 3 | 6 | 1 | 3 | Ghana |
| 341 | DRD280 | 2 | 2 | 3 | 2 | 5 | 3 | 2 | 4 | 2 | 3 | 3 | 4 | 4 | 2 | 5 | 1 | 4 | 3 | 3 | 3 | 3 | 5 | 1 | 3 | Ghana |
| 342 | DRD282 | 2 | 2 | 3 | 2 | 5 | 3 | 3 | 4 | 2 | 3 | 3 | 4 | 4 | 2 | 5 | 1 | 4 | 3 | 3 | 3 | 3 | 5 | 1 | 3 | Ghana |
| 343 | DRD287 | 2 | 2 | 3 | 2 | 5 | 3 | 3 | 4 | 2 | 4 | 3 | 4 | 4 | 2 | 5 | 2 | 4 | 3 | 3 | 3 | 3 | 6 | 1 | 3 | Ghana |
| 344 | DRD292 | 2 | 2 | 3 | 2 | 5 | 3 | 3 | 3 | 2 | 4 | 3 | 4 | 4 | 2 | 5 | 1 | 4 | 3 | 3 | 3 | 3 | 6 | 1 | 3 | Ghana |
| 345 | DRD294 | 2 | 2 | 3 | 2 | 5 | 3 | 3 | 4 | 2 | 4 | 3 | 4 | 4 | 2 | 5 | 1 | 4 | 3 | 3 | 3 | 3 | 6 | 1 | 3 | Ghana |
| 346 | DRD295 | 2 | 2 | 3 | 2 | 5 | 3 | 3 | 4 | 2 | 3 | 2 | 4 | 4 | 2 | 5 | 1 | 4 | 3 | 3 | 3 | 4 | 6 | 1 | 3 | Ghana |
| 347 | DRD31  | 3 | 2 | 3 | 2 | 5 | 3 | 3 | 4 | 2 | 3 | 3 | 4 | 4 | 2 | 5 | 1 | 4 | 3 | 3 | 3 | 3 | 6 | 2 | 3 | Ghana |
| 348 | DRD311 | 2 | 2 | 3 | 2 | 5 | 2 | 3 | 3 | 2 | 3 | 3 | 4 | 3 | 2 | 5 | 1 | 4 | 3 | 3 | 3 | 3 | 6 | 1 | 3 | Ghana |
| 349 | DRD32  | 2 | 2 | 3 | 2 | 5 | 3 | 3 | 4 | 2 | 4 | 3 | 4 | 4 | 2 | 5 | 1 | 4 | 3 | 3 | 2 | 3 | 5 | 1 | 3 | Ghana |
| 350 | DRD320 | 2 | 2 | 3 | 2 | 5 | 3 | 3 | 3 | 2 | 4 | 3 | 4 | 4 | 2 | 5 | 1 | 4 | 3 | 3 | 3 | 3 | 6 | 1 | 3 | Ghana |
| 351 | DRD327 | 2 | 2 | 3 | 2 | 5 | 3 | 3 | 4 | 2 | 3 | 3 | 4 | 4 | 2 | 5 | 1 | 4 | 3 | 3 | 4 | 3 | 6 | 1 | 3 | Ghana |
| 352 | DRD329 | 2 | 2 | 3 | 2 | 5 | 3 | 2 | 4 | 2 | 4 | 3 | 4 | 4 | 2 | 5 | 1 | 4 | 3 | 3 | 3 | 3 | 6 | 2 | 3 | Ghana |
| 353 | DRD332 | 2 | 2 | 3 | 2 | 5 | 3 | 3 | 4 | 2 | 4 | 3 | 4 | 4 | 2 | 5 | 1 | 4 | 3 | 3 | 3 | 4 | 6 | 1 | 3 | Ghana |
| 354 | DRD336 | 2 | 2 | 3 | 2 | 5 | 3 | 2 | 4 | 2 | 3 | 3 | 4 | 3 | 2 | 5 | 1 | 4 | 3 | 3 | 3 | 3 | 6 | 1 | 3 | Ghana |
| 355 | DRD337 | 2 | 2 | 3 | 2 | 5 | 3 | 3 | 3 | 2 | 4 | 3 | 4 | 4 | 2 | 5 | 1 | 4 | 3 | 3 | 3 | 3 | 6 | 1 | 3 | Ghana |
| 356 | DRD349 | 2 | 2 | 3 | 2 | 5 | 3 | 2 | 4 | 2 | 3 | 3 | 4 | 4 | 2 | 5 | 1 | 4 | 3 | 3 | 3 | 3 | 6 | 2 | 3 | Ghana |
| 357 | DRD357 | 2 | 2 | 3 | 2 | 5 | 3 | 2 | 4 | 2 | 3 | 3 | 4 | 4 | 1 | 5 | 1 | 4 | 3 | 3 | 3 | 3 | 5 | 1 | 3 | Ghana |
| 358 | DRD369 | 2 | 2 | 3 | 2 | 3 | 3 | 3 | 4 | 2 | 3 | 3 | 4 | 4 | 2 | 5 | 1 | 4 | 3 | 3 | 3 | 3 | 6 | 1 | 3 | Ghana |
| 359 | DRD376 | 2 | 2 | 3 | 2 | 5 | 3 | 3 | 4 | 2 | 3 | 3 | 4 | 4 | 2 | 5 | 1 | 4 | 3 | 3 | 3 | 3 | 6 | 1 | 3 | Ghana |

|     |        |   |   |   |   |   |   |   |   |   |   |   |   |   |   |   |   |   |   |   |   |   |   |   |   |         |
|-----|--------|---|---|---|---|---|---|---|---|---|---|---|---|---|---|---|---|---|---|---|---|---|---|---|---|---------|
| 360 | DRD377 | 2 | 2 | 3 | 2 | 5 | 3 | 2 | 4 | 2 | 4 | 3 | 4 | 4 | 2 | 5 | 2 | 4 | 3 | 3 | 3 | 3 | 6 | 1 | 3 | Ghana   |
| 361 | DRD383 | 2 | 2 | 3 | 2 | 5 | 3 | 3 | 4 | 2 | 4 | 3 | 4 | 4 | 2 | 5 | 1 | 4 | 3 | 3 | 3 | 3 | 6 | 1 | 3 | Ghana   |
| 362 | DRD386 | 2 | 2 | 3 | 2 | 5 | 3 | 3 | 4 | 2 | 3 | 3 | 4 | 4 | 2 | 5 | 1 | 3 | 3 | 3 | 3 | 3 | 6 | 1 | 3 | Ghana   |
| 363 | DRD391 | 2 | 2 | 3 | 2 | 5 | 3 | 3 | 4 | 2 | 3 | 3 | 4 | 4 | 2 | 5 | 1 | 4 | 3 | 3 | 3 | 3 | 6 | 1 | 3 | Ghana   |
| 364 | DRD40  | 2 | 2 | 3 | 2 | 5 | 3 | 3 | 3 | 2 | 3 | 3 | 4 | 4 | 2 | 5 | 1 | 4 | 3 | 3 | 3 | 3 | 6 | 4 | 3 | Ghana   |
| 365 | DRD401 | 2 | 2 | 3 | 2 | 5 | 3 | 3 | 4 | 2 | 3 | 3 | 4 | 4 | 2 | 5 | 1 | 4 | 3 | 3 | 2 | 3 | 6 | 1 | 3 | Ghana   |
| 366 | DRD409 | 2 | 2 | 3 | 2 | 5 | 3 | 3 | 4 | 2 | 4 | 3 | 4 | 4 | 2 | 5 | 1 | 4 | 3 | 3 | 3 | 3 | 6 | 1 | 3 | Ghana   |
| 367 | DRD41  | 2 | 2 | 3 | 2 | 3 | 3 | 2 | 4 | 2 | 3 | 3 | 4 | 4 | 2 | 5 | 1 | 4 | 3 | 3 | 3 | 3 | 6 | 1 | 3 | Ghana   |
| 368 | DRD412 | 2 | 2 | 3 | 2 | 5 | 3 | 3 | 4 | 2 | 3 | 3 | 4 | 4 | 2 | 5 | 1 | 4 | 3 | 3 | 4 | 3 | 6 | 1 | 3 | Ghana   |
| 369 | DRD416 | 2 | 2 | 3 | 2 | 5 | 3 | 3 | 4 | 2 | 3 | 3 | 4 | 4 | 2 | 5 | 1 | 4 | 3 | 3 | 3 | 3 | 6 | 1 | 3 | Ghana   |
| 370 | DRD423 | 2 | 2 | 3 | 2 | 5 | 3 | 3 | 3 | 2 | 3 | 3 | 4 | 4 | 2 | 5 | 1 | 4 | 3 | 3 | 2 | 3 | 6 | 1 | 3 | Ghana   |
| 371 | DRD425 | 2 | 2 | 3 | 2 | 5 | 3 | 3 | 3 | 2 | 4 | 3 | 4 | 4 | 2 | 5 | 1 | 4 | 3 | 3 | 3 | 3 | 6 | 1 | 3 | Ghana   |
| 372 | DRD453 | 2 | 1 | 3 | 2 | 5 | 3 | 2 | 4 | 2 | 3 | 3 | 4 | 4 | 2 | 5 | 1 | 4 | 3 | 3 | 3 | 3 | 6 | 1 | 3 | Ghana   |
| 373 | DRD458 | 2 | 2 | 3 | 2 | 3 | 3 | 3 | 3 | 2 | 3 | 3 | 4 | 4 | 2 | 5 | 1 | 4 | 3 | 3 | 3 | 3 | 6 | 1 | 3 | Ghana   |
| 374 | DRD462 | 3 | 2 | 3 | 2 | 5 | 3 | 2 | 4 | 2 | 3 | 3 | 4 | 4 | 1 | 5 | 1 | 4 | 3 | 3 | 3 | 3 | 5 | 2 | 3 | Ghana   |
| 375 | DRD464 | 2 | 2 | 3 | 2 | 5 | 3 | 2 | 4 | 2 | 3 | 3 | 4 | 4 | 2 | 5 | 1 | 4 | 3 | 3 | 2 | 3 | 6 | 1 | 3 | Ghana   |
| 376 | DRD488 | 2 | 2 | 3 | 2 | 5 | 3 | 3 | 3 | 2 | 4 | 3 | 4 | 4 | 2 | 5 | 1 | 4 | 3 | 3 | 3 | 3 | 6 | 1 | 3 | Ghana   |
| 377 | DRD5   | 2 | 2 | 3 | 2 | 5 | 3 | 3 | 4 | 2 | 3 | 3 | 4 | 4 | 2 | 5 | 1 | 4 | 3 | 3 | 3 | 3 | 6 | 1 | 3 | Ghana   |
| 378 | DRD505 | 2 | 2 | 3 | 2 | 5 | 3 | 3 | 3 | 2 | 4 | 3 | 4 | 4 | 2 | 5 | 1 | 4 | 3 | 3 | 3 | 3 | 6 | 1 | 3 | Ghana   |
| 379 | DRD535 | 2 | 2 | 3 | 2 | 5 | 3 | 3 | 4 | 2 | 3 | 3 | 4 | 4 | 2 | 5 | 1 | 4 | 3 | 3 | 3 | 3 | 6 | 1 | 3 | Ghana   |
| 380 | DRD55  | 2 | 2 | 3 | 2 | 5 | 3 | 3 | 4 | 2 | 3 | 3 | 4 | 4 | 2 | 5 | 1 | 4 | 3 | 3 | 4 | 3 | 6 | 1 | 3 | Ghana   |
| 381 | DRD556 | 2 | 2 | 3 | 2 | 5 | 3 | 3 | 4 | 2 | 3 | 3 | 4 | 4 | 2 | 5 | 1 | 4 | 3 | 3 | 3 | 3 | 6 | 1 | 3 | Ghana   |
| 382 | DRD60  | 2 | 3 | 3 | 2 | 5 | 3 | 3 | 4 | 2 | 4 | 3 | 4 | 4 | 2 | 5 | 1 | 3 | 3 | 3 | 3 | 3 | 6 | 1 | 3 | Ghana   |
| 383 | DRD607 | 2 | 2 | 3 | 2 | 5 | 3 | 3 | 4 | 2 | 3 | 3 | 4 | 4 | 2 | 5 | 1 | 4 | 3 | 3 | 3 | 3 | 6 | 1 | 3 | Ghana   |
| 384 | DRD617 | 2 | 2 | 3 | 2 | 5 | 3 | 1 | 4 | 2 | 3 | 3 | 4 | 4 | 2 | 5 | 1 | 4 | 3 | 3 | 3 | 3 | 6 | 1 | 3 | Ghana   |
| 385 | DRD625 | 2 | 2 | 3 | 2 | 5 | 3 | 3 | 4 | 2 | 4 | 3 | 4 | 4 | 2 | 4 | 1 | 4 | 3 | 3 | 3 | 3 | 6 | 1 | 3 | Ghana   |
| 386 | DRD629 | 2 | 2 | 3 | 2 | 5 | 3 | 3 | 4 | 2 | 3 | 3 | 4 | 4 | 2 | 5 | 1 | 4 | 3 | 3 | 3 | 3 | 6 | 1 | 3 | Ghana   |
| 387 | DRD642 | 2 | 2 | 3 | 2 | 5 | 3 | 2 | 4 | 2 | 3 | 3 | 4 | 4 | 2 | 5 | 1 | 4 | 3 | 3 | 3 | 3 | 6 | 1 | 3 | Ghana   |
| 388 | DRD676 | 2 | 2 | 3 | 2 | 5 | 3 | 3 | 4 | 2 | 3 | 3 | 4 | 4 | 2 | 5 | 1 | 4 | 3 | 3 | 4 | 3 | 6 | 1 | 3 | Ghana   |
| 389 | DRD680 | 2 | 2 | 3 | 2 | 5 | 3 | 3 | 4 | 2 | 3 | 3 | 4 | 4 | 2 | 5 | 1 | 4 | 3 | 3 | 3 | 3 | 6 | 1 | 3 | Ghana   |
| 390 | DRD682 | 2 | 2 | 3 | 2 | 5 | 3 | 3 | 4 | 2 | 3 | 3 | 4 | 4 | 2 | 5 | 1 | 4 | 3 | 3 | 4 | 3 | 6 | 1 | 3 | Ghana   |
| 391 | DRD686 | 2 | 2 | 3 | 2 | 5 | 3 | 2 | 4 | 2 | 4 | 3 | 4 | 4 | 2 | 5 | 1 | 4 | 3 | 3 | 3 | 3 | 6 | 2 | 3 | Ghana   |
| 392 | DRD100 | 2 | 2 | 3 | 2 | 3 | 5 | 2 | 3 | 2 | 4 | 3 | 4 | 4 | 2 | 5 | 1 | 5 | 3 | 3 | 3 | 3 | 5 | 3 | 2 | Haarlem |
| 393 | DRD101 | 2 | 2 | 3 | 2 | 3 | 5 | 3 | 3 | 2 | 4 | 3 | 4 | 4 | 2 | 5 | 2 | 5 | 3 | 3 | 3 | 3 | 5 | 3 | 2 | Haarlem |
| 394 | DRD103 | 2 | 2 | 4 | 2 | 2 | 6 | 3 | 3 | 2 | 4 | 2 | 4 | 4 | 2 | 5 | 1 | 5 | 3 | 3 | 3 | 3 | 5 | 3 | 2 | Haarlem |
| 395 | DRD128 | 2 | 2 | 3 | 2 | 3 | 5 | 3 | 3 | 2 | 4 | 3 | 4 | 3 | 2 | 5 | 1 | 5 | 3 | 3 | 3 | 3 | 5 | 3 | 2 | Haarlem |
| 396 | DRD145 | 2 | 2 | 3 | 2 | 3 | 5 | 2 | 3 | 2 | 4 | 3 | 4 | 4 | 2 | 5 | 1 | 5 | 3 | 3 | 3 | 3 | 6 | 3 | 2 | Haarlem |
| 397 | DRD182 | 2 | 2 | 4 | 2 | 2 | 6 | 3 | 3 | 2 | 4 | 2 | 4 | 4 | 2 | 5 | 1 | 5 | 3 | 3 | 3 | 3 | 5 | 3 | 2 | Haarlem |
| 398 | DRD242 | 2 | 2 | 3 | 2 | 3 | 5 | 3 | 3 | 2 | 4 | 4 | 4 | 3 | 2 | 5 | 1 | 5 | 3 | 3 | 3 | 3 | 5 | 3 | 2 | Haarlem |
| 399 | DRD25  | 2 | 2 | 3 | 2 | 3 | 5 | 3 | 3 | 2 | 4 | 3 | 4 | 4 | 2 | 5 | 1 | 5 | 3 | 3 | 3 | 3 | 6 | 3 | 2 | Haarlem |

|     |        |   |   |   |   |   |   |   |   |   |   |   |   |   |   |   |   |   |   |   |   |   |   |   |   |         |         |
|-----|--------|---|---|---|---|---|---|---|---|---|---|---|---|---|---|---|---|---|---|---|---|---|---|---|---|---------|---------|
| 400 | DRD251 | 2 | 2 | 4 | 2 | 2 | 6 | 3 | 3 | 2 | 4 | 2 | 4 | 4 | 2 | 5 | 1 | 5 | 3 | 3 | 3 | 3 | 3 | 6 | 3 | 2       | Haarlem |
| 401 | DRD272 | 2 | 2 | 4 | 2 | 2 | 4 | 3 | 3 | 2 | 4 | 2 | 4 | 4 | 2 | 5 | 1 | 5 | 3 | 3 | 3 | 3 | 3 | 5 | 3 | 2       | Haarlem |
| 402 | DRD286 | 2 | 1 | 3 | 2 | 3 | 5 | 3 | 3 | 2 | 6 | 3 | 4 | 3 | 2 | 3 | 1 | 5 | 3 | 3 | 3 | 3 | 5 | 3 | 2 | Haarlem |         |
| 403 | DRD289 | 2 | 2 | 3 | 2 | 3 | 6 | 3 | 3 | 2 | 5 | 3 | 4 | 4 | 2 | 5 | 1 | 5 | 3 | 3 | 3 | 2 | 5 | 3 | 2 | Haarlem |         |
| 404 | DRD303 | 2 | 2 | 3 | 2 | 3 | 4 | 2 | 3 | 2 | 7 | 3 | 4 | 4 | 2 | 5 | 1 | 5 | 3 | 3 | 3 | 3 | 6 | 3 | 2 | Haarlem |         |
| 405 | DRD313 | 2 | 2 | 4 | 2 | 2 | 4 | 3 | 3 | 2 | 4 | 2 | 4 | 4 | 2 | 5 | 1 | 5 | 3 | 3 | 3 | 3 | 5 | 3 | 2 | Haarlem |         |
| 406 | DRD319 | 2 | 2 | 3 | 2 | 3 | 5 | 3 | 3 | 2 | 3 | 3 | 4 | 4 | 2 | 5 | 2 | 5 | 3 | 3 | 3 | 3 | 5 | 3 | 2 | Haarlem |         |
| 407 | DRD366 | 2 | 2 | 4 | 2 | 2 | 6 | 3 | 3 | 2 | 4 | 3 | 4 | 4 | 2 | 5 | 1 | 5 | 3 | 3 | 3 | 2 | 5 | 3 | 2 | Haarlem |         |
| 408 | DRD372 | 2 | 2 | 4 | 2 | 3 | 6 | 3 | 3 | 2 | 4 | 2 | 4 | 4 | 2 | 5 | 1 | 5 | 3 | 3 | 3 | 3 | 5 | 3 | 2 | Haarlem |         |
| 409 | DRD399 | 2 | 2 | 4 | 2 | 2 | 4 | 3 | 3 | 2 | 4 | 3 | 4 | 4 | 2 | 5 | 1 | 5 | 3 | 3 | 3 | 3 | 6 | 3 | 2 | Haarlem |         |
| 410 | DRD403 | 2 | 2 | 3 | 2 | 3 | 5 | 3 | 3 | 2 | 3 | 3 | 4 | 4 | 2 | 5 | 2 | 5 | 3 | 3 | 3 | 3 | 5 | 3 | 2 | Haarlem |         |
| 411 | DRD42  | 2 | 2 | 3 | 2 | 3 | 5 | 2 | 3 | 1 | 7 | 3 | 4 | 4 | 2 | 5 | 1 | 5 | 3 | 3 | 3 | 3 | 6 | 3 | 2 | Haarlem |         |
| 412 | DRD429 | 2 | 2 | 3 | 2 | 3 | 5 | 3 | 3 | 2 | 4 | 3 | 4 | 4 | 2 | 5 | 1 | 5 | 3 | 3 | 3 | 3 | 7 | 3 | 2 | Haarlem |         |
| 413 | DRD441 | 2 | 2 | 4 | 2 | 2 | 6 | 3 | 3 | 2 | 4 | 2 | 4 | 4 | 2 | 5 | 1 | 5 | 3 | 3 | 3 | 3 | 5 | 3 | 2 | Haarlem |         |
| 414 | DRD445 | 2 | 2 | 4 | 2 | 2 | 6 | 3 | 3 | 2 | 4 | 3 | 4 | 4 | 2 | 5 | 1 | 5 | 3 | 3 | 3 | 3 | 5 | 3 | 2 | Haarlem |         |
| 415 | DRD447 | 2 | 2 | 4 | 2 | 3 | 4 | 3 | 3 | 2 | 4 | 2 | 4 | 4 | 2 | 5 | 1 | 5 | 3 | 3 | 3 | 3 | 6 | 3 | 2 | Haarlem |         |
| 416 | DRD45  | 2 | 2 | 3 | 2 | 3 | 5 | 3 | 3 | 2 | 6 | 3 | 4 | 4 | 2 | 4 | 1 | 5 | 3 | 3 | 3 | 3 | 7 | 3 | 2 | Haarlem |         |
| 417 | DRD484 | 2 | 2 | 4 | 2 | 2 | 6 | 3 | 3 | 2 | 4 | 2 | 4 | 4 | 2 | 5 | 1 | 5 | 3 | 3 | 3 | 2 | 5 | 3 | 2 | Haarlem |         |
| 418 | DRD49  | 2 | 2 | 3 | 2 | 3 | 5 | 2 | 3 | 2 | 3 | 3 | 4 | 4 | 2 | 5 | 1 | 5 | 3 | 3 | 3 | 3 | 5 | 3 | 2 | Haarlem |         |
| 419 | DRD502 | 2 | 2 | 4 | 2 | 2 | 6 | 3 | 3 | 2 | 4 | 2 | 4 | 4 | 2 | 5 | 1 | 5 | 3 | 3 | 3 | 3 | 5 | 3 | 2 | Haarlem |         |
| 420 | DRD505 | 2 | 2 | 4 | 2 | 2 | 4 | 3 | 3 | 2 | 4 | 2 | 4 | 4 | 2 | 5 | 1 | 5 | 3 | 3 | 3 | 3 | 6 | 3 | 2 | Haarlem |         |
| 421 | DRD508 | 2 | 2 | 4 | 2 | 2 | 6 | 3 | 3 | 2 | 4 | 2 | 4 | 4 | 2 | 5 | 1 | 5 | 3 | 3 | 3 | 3 | 5 | 3 | 2 | Haarlem |         |
| 422 | DRD517 | 2 | 2 | 4 | 2 | 4 | 5 | 3 | 3 | 2 | 1 | 2 | 4 | 4 | 2 | 5 | 1 | 5 | 3 | 3 | 3 | 3 | 5 | 3 | 2 | Haarlem |         |
| 423 | DRD537 | 2 | 2 | 4 | 2 | 2 | 4 | 3 | 3 | 2 | 4 | 2 | 4 | 4 | 2 | 5 | 1 | 5 | 3 | 3 | 3 | 3 | 5 | 3 | 2 | Haarlem |         |
| 424 | DRD54  | 2 | 2 | 4 | 2 | 2 | 6 | 3 | 3 | 2 | 4 | 3 | 4 | 4 | 2 | 5 | 1 | 5 | 3 | 3 | 3 | 3 | 5 | 3 | 2 | Haarlem |         |
| 425 | DRD547 | 2 | 2 | 4 | 2 | 3 | 6 | 3 | 3 | 2 | 4 | 2 | 4 | 4 | 2 | 5 | 1 | 5 | 3 | 3 | 3 | 3 | 6 | 3 | 2 | Haarlem |         |
| 426 | DRD561 | 2 | 2 | 4 | 2 | 2 | 6 | 3 | 3 | 2 | 4 | 2 | 4 | 4 | 2 | 5 | 1 | 5 | 3 | 3 | 3 | 2 | 5 | 3 | 2 | Haarlem |         |
| 427 | DRD567 | 2 | 2 | 4 | 2 | 2 | 6 | 3 | 3 | 2 | 4 | 3 | 4 | 4 | 2 | 5 | 1 | 5 | 3 | 3 | 3 | 3 | 5 | 3 | 2 | Haarlem |         |
| 428 | DRD580 | 2 | 2 | 4 | 2 | 2 | 6 | 3 | 3 | 2 | 4 | 2 | 4 | 4 | 2 | 5 | 1 | 5 | 3 | 3 | 3 | 3 | 5 | 3 | 2 | Haarlem |         |
| 429 | DRD599 | 2 | 2 | 4 | 2 | 2 | 6 | 3 | 3 | 2 | 4 | 3 | 4 | 4 | 2 | 5 | 1 | 5 | 3 | 3 | 3 | 3 | 5 | 3 | 2 | Haarlem |         |
| 430 | DRD623 | 2 | 2 | 4 | 2 | 2 | 6 | 3 | 3 | 2 | 4 | 2 | 4 | 4 | 2 | 5 | 1 | 5 | 3 | 3 | 3 | 2 | 5 | 3 | 2 | Haarlem |         |
| 431 | DRD63  | 2 | 2 | 3 | 2 | 2 | 5 | 3 | 3 | 2 | 4 | 3 | 4 | 4 | 2 | 5 | 2 | 5 | 3 | 3 | 3 | 2 | 5 | 3 | 2 | Haarlem |         |
| 432 | DRD630 | 2 | 2 | 3 | 2 | 3 | 5 | 3 | 3 | 2 | 3 | 3 | 4 | 4 | 2 | 5 | 1 | 5 | 3 | 3 | 3 | 3 | 5 | 3 | 2 | Haarlem |         |
| 433 | DRD64  | 2 | 2 | 4 | 2 | 3 | 6 | 3 | 3 | 2 | 4 | 3 | 4 | 4 | 2 | 5 | 1 | 5 | 3 | 3 | 3 | 2 | 5 | 3 | 2 | Haarlem |         |
| 434 | DRD672 | 2 | 2 | 4 | 2 | 2 | 6 | 3 | 3 | 2 | 4 | 2 | 4 | 4 | 2 | 5 | 1 | 5 | 3 | 3 | 3 | 3 | 5 | 3 | 2 | Haarlem |         |
| 435 | DRD678 | 2 | 2 | 4 | 2 | 3 | 4 | 2 | 3 | 2 | 4 | 2 | 4 | 4 | 2 | 5 | 1 | 5 | 3 | 3 | 3 | 3 | 6 | 3 | 2 | Haarlem |         |
| 436 | DRD70  | 2 | 2 | 4 | 2 | 2 | 6 | 3 | 3 | 2 | 4 | 3 | 4 | 4 | 2 | 5 | 1 | 5 | 3 | 3 | 3 | 3 | 5 | 3 | 2 | Haarlem |         |
| 437 | DRD124 | 2 | 2 | 2 | 2 | 1 | 4 | 3 | 3 | 2 | 3 | 2 | 4 | 1 | 2 | 5 | 1 | 4 | 3 | 3 | 4 | 2 | 3 | 2 | 2 | LAM     |         |
| 438 | DRD159 | 2 | 4 | 4 | 2 | 1 | 4 | 2 | 3 | 2 | 2 | 2 | 4 | 1 | 1 | 6 | 1 | 4 | 3 | 5 | 3 | 3 | 3 | 2 | 2 | LAM     |         |
| 439 | DRD160 | 2 | 2 | 2 | 2 | 1 | 4 | 3 | 3 | 2 | 3 | 2 | 4 | 1 | 2 | 6 | 1 | 4 | 3 | 1 | 4 | 2 | 3 | 2 | 2 | LAM     |         |

|     |        |   |   |   |   |   |   |   |   |   |   |   |   |   |   |   |   |   |   |   |   |   |   |   |   |       |
|-----|--------|---|---|---|---|---|---|---|---|---|---|---|---|---|---|---|---|---|---|---|---|---|---|---|---|-------|
| 440 | DRD168 | 1 | 3 | 4 | 2 | 2 | 4 | 3 | 3 | 2 | 2 | 1 | 4 | 1 | 2 | 6 | 1 | 5 | 3 | 3 | 2 | 2 | 5 | 2 | 2 | LAM   |
| 441 | DRD236 | 2 | 2 | 2 | 2 | 1 | 4 | 3 | 3 | 2 | 3 | 2 | 4 | 1 | 2 | 6 | 1 | 4 | 3 | 3 | 4 | 2 | 3 | 2 | 2 | LAM   |
| 442 | DRD269 | 2 | 2 | 2 | 2 | 1 | 4 | 3 | 3 | 2 | 3 | 2 | 4 | 1 | 2 | 6 | 1 | 4 | 3 | 3 | 4 | 2 | 3 | 2 | 2 | LAM   |
| 443 | DRD30  | 2 | 2 | 2 | 2 | 1 | 4 | 3 | 3 | 2 | 3 | 2 | 4 | 1 | 2 | 6 | 1 | 4 | 3 | 3 | 4 | 2 | 3 | 2 | 2 | LAM   |
| 444 | DRD315 | 2 | 4 | 4 | 2 | 2 | 4 | 2 | 3 | 2 | 3 | 2 | 4 | 1 | 1 | 6 | 1 | 4 | 3 | 5 | 3 | 3 | 8 | 2 | 2 | LAM   |
| 445 | DRD322 | 2 | 2 | 2 | 2 | 1 | 4 | 3 | 3 | 2 | 3 | 2 | 4 | 1 | 2 | 5 | 1 | 4 | 3 | 2 | 4 | 2 | 3 | 2 | 2 | LAM   |
| 446 | DRD364 | 2 | 1 | 2 | 2 | 1 | 4 | 3 | 3 | 2 | 3 | 2 | 4 | 1 | 2 | 6 | 1 | 4 | 3 | 3 | 4 | 2 | 3 | 2 | 2 | LAM   |
| 447 | DRD367 | 2 | 2 | 2 | 2 | 1 | 4 | 3 | 3 | 2 | 3 | 2 | 4 | 1 | 2 | 6 | 1 | 4 | 3 | 3 | 4 | 2 | 3 | 2 | 2 | LAM   |
| 448 | DRD396 | 1 | 3 | 4 | 2 | 2 | 4 | 2 | 3 | 2 | 2 | 1 | 4 | 1 | 2 | 6 | 1 | 5 | 3 | 3 | 2 | 2 | 5 | 2 | 2 | LAM   |
| 449 | DRD422 | 2 | 2 | 2 | 2 | 1 | 4 | 3 | 3 | 2 | 3 | 2 | 4 | 1 | 2 | 5 | 1 | 4 | 3 | 3 | 4 | 2 | 3 | 2 | 2 | LAM   |
| 450 | DRD44  | 2 | 4 | 4 | 2 | 1 | 4 | 2 | 3 | 2 | 3 | 2 | 4 | 1 | 1 | 6 | 1 | 4 | 3 | 5 | 3 | 3 | 8 | 2 | 2 | LAM   |
| 451 | DRD446 | 2 | 1 | 2 | 2 | 1 | 4 | 3 | 3 | 2 | 3 | 2 | 4 | 1 | 2 | 6 | 1 | 4 | 3 | 1 | 4 | 2 | 3 | 2 | 2 | LAM   |
| 452 | DRD449 | 2 | 2 | 2 | 2 | 1 | 4 | 3 | 3 | 2 | 3 | 2 | 4 | 1 | 2 | 6 | 1 | 4 | 3 | 3 | 4 | 2 | 3 | 2 | 2 | LAM   |
| 453 | DRD456 | 2 | 2 | 2 | 2 | 1 | 4 | 3 | 3 | 2 | 3 | 2 | 4 | 1 | 2 | 6 | 1 | 4 | 3 | 3 | 4 | 2 | 3 | 2 | 2 | LAM   |
| 454 | DRD476 | 2 | 1 | 2 | 2 | 1 | 4 | 3 | 3 | 2 | 3 | 2 | 4 | 1 | 2 | 6 | 1 | 4 | 3 | 3 | 4 | 2 | 3 | 2 | 2 | LAM   |
| 455 | DRD483 | 2 | 2 | 2 | 2 | 1 | 4 | 3 | 3 | 2 | 3 | 2 | 4 | 1 | 2 | 5 | 1 | 4 | 3 | 3 | 4 | 2 | 3 | 2 | 2 | LAM   |
| 456 | DRD495 | 2 | 2 | 2 | 2 | 1 | 4 | 3 | 3 | 2 | 3 | 2 | 4 | 1 | 2 | 5 | 1 | 4 | 3 | 1 | 4 | 2 | 3 | 2 | 2 | LAM   |
| 457 | DRD498 | 2 | 1 | 2 | 2 | 1 | 4 | 3 | 3 | 2 | 3 | 2 | 4 | 1 | 2 | 6 | 1 | 4 | 3 | 3 | 4 | 2 | 3 | 2 | 2 | LAM   |
| 458 | DRD518 | 2 | 2 | 2 | 2 | 1 | 4 | 3 | 3 | 2 | 3 | 2 | 4 | 1 | 2 | 6 | 1 | 4 | 3 | 3 | 4 | 2 | 3 | 2 | 2 | LAM   |
| 459 | DRD519 | 2 | 4 | 4 | 2 | 2 | 4 | 2 | 3 | 2 | 2 | 2 | 4 | 1 | 1 | 6 | 1 | 4 | 3 | 5 | 3 | 3 | 3 | 2 | 2 | LAM   |
| 460 | DRD53  | 2 | 2 | 2 | 2 | 1 | 4 | 3 | 3 | 2 | 3 | 2 | 4 | 1 | 2 | 6 | 1 | 4 | 3 | 3 | 4 | 2 | 3 | 2 | 2 | LAM   |
| 461 | DRD663 | 2 | 3 | 2 | 2 | 1 | 4 | 3 | 3 | 2 | 3 | 2 | 4 | 1 | 2 | 5 | 1 | 4 | 3 | 1 | 4 | 2 | 3 | 2 | 2 | LAM   |
| 462 | DRD683 | 2 | 3 | 2 | 2 | 1 | 4 | 3 | 3 | 2 | 3 | 2 | 4 | 1 | 2 | 6 | 1 | 4 | 3 | 3 | 4 | 2 | 3 | 2 | 2 | LAM   |
| 463 | DRD104 | 2 | 2 | 4 | 2 | 3 | 2 | 2 | 5 | 2 | 3 | 3 | 4 | 2 | 1 | 5 | 1 | 4 | 3 | 2 | 3 | 3 | 3 | 2 | 2 | NEW-1 |
| 464 | DRD156 | 2 | 2 | 4 | 2 | 3 | 2 | 2 | 5 | 2 | 2 | 3 | 6 | 2 | 1 | 5 | 1 | 4 | 3 | 2 | 3 | 3 | 8 | 2 | 2 | NEW-1 |
| 465 | DRD184 | 2 | 1 | 4 | 2 | 3 | 2 | 2 | 5 | 2 | 3 | 3 | 4 | 2 | 1 | 5 | 1 | 4 | 3 | 2 | 3 | 3 | 7 | 2 | 2 | NEW-1 |
| 466 | DRD340 | 2 | 2 | 4 | 2 | 3 | 2 | 2 | 5 | 2 | 2 | 3 | 4 | 2 | 1 | 5 | 1 | 4 | 3 | 2 | 3 | 3 | 3 | 2 | 2 | NEW-1 |
| 467 | DRD365 | 2 | 1 | 4 | 2 | 3 | 2 | 2 | 5 | 2 | 2 | 3 | 4 | 2 | 1 | 5 | 1 | 4 | 3 | 2 | 3 | 3 | 8 | 2 | 2 | NEW-1 |
| 468 | DRD435 | 2 | 2 | 4 | 2 | 3 | 2 | 2 | 5 | 2 | 3 | 3 | 4 | 1 | 1 | 5 | 1 | 4 | 3 | 2 | 3 | 3 | 3 | 2 | 2 | NEW-1 |
| 469 | DRD56  | 2 | 2 | 4 | 2 | 3 | 2 | 2 | 5 | 2 | 2 | 3 | 4 | 2 | 1 | 5 | 1 | 4 | 3 | 2 | 3 | 3 | 8 | 2 | 2 | NEW-1 |
| 470 | DRD58  | 2 | 1 | 4 | 2 | 3 | 2 | 2 | 5 | 2 | 3 | 3 | 4 | 2 | 1 | 5 | 1 | 4 | 3 | 2 | 3 | 3 | 3 | 2 | 2 | NEW-1 |
| 471 | DRD639 | 2 | 2 | 3 | 2 | 3 | 2 | 2 | 5 | 2 | 2 | 3 | 4 | 2 | 1 | 5 | 1 | 4 | 3 | 2 | 3 | 3 | 8 | 2 | 2 | NEW-1 |
| 472 | DRD68  | 2 | 1 | 4 | 2 | 3 | 2 | 2 | 5 | 2 | 3 | 3 | 4 | 2 | 1 | 5 | 1 | 4 | 3 | 2 | 3 | 3 | 8 | 2 | 2 | NEW-1 |
| 473 | DRD205 | 3 | 3 | 4 | 2 | 4 | 3 | 3 | 1 | 2 | 4 | 4 | 3 | 2 | 2 | 5 | 1 | 4 | 3 | 3 | 2 | 3 | 9 | 2 | 2 | S     |
| 474 | DRD21  | 3 | 3 | 4 | 3 | 2 | 3 | 3 | 1 | 2 | 5 | 4 | 3 | 2 | 2 | 5 | 1 | 4 | 3 | 3 | 2 | 3 | 7 | 2 | 2 | S     |
| 475 | DRD233 | 3 | 3 | 4 | 3 | 4 | 3 | 3 | 1 | 2 | 4 | 4 | 3 | 2 | 2 | 5 | 1 | 4 | 3 | 3 | 2 | 3 | 5 | 2 | 2 | S     |
| 476 | DRD254 | 3 | 3 | 4 | 3 | 4 | 3 | 3 | 1 | 2 | 4 | 4 | 3 | 2 | 2 | 5 | 1 | 4 | 3 | 3 | 2 | 3 | 5 | 2 | 2 | S     |
| 477 | DRD28  | 3 | 3 | 4 | 3 | 5 | 3 | 3 | 1 | 2 | 4 | 4 | 3 | 2 | 2 | 5 | 1 | 3 | 3 | 3 | 2 | 3 | 5 | 2 | 2 | S     |
| 478 | DRD308 | 2 | 3 | 4 | 3 | 5 | 3 | 3 | 1 | 2 | 5 | 4 | 4 | 2 | 2 | 6 | 1 | 3 | 3 | 3 | 3 | 3 | 4 | 1 | 2 | S     |
| 479 | DRD310 | 1 | 4 | 4 | 2 | 5 | 3 | 5 | 2 | 2 | 4 | 2 | 4 | 2 | 3 | 5 | 1 | 3 | 2 | 2 | 3 | 6 | 4 | 1 | 2 | S     |

|     |        |   |   |   |   |   |   |   |   |   |   |   |   |   |   |   |   |   |   |   |   |   |   |   |   |           |
|-----|--------|---|---|---|---|---|---|---|---|---|---|---|---|---|---|---|---|---|---|---|---|---|---|---|---|-----------|
| 480 | DRD335 | 3 | 3 | 4 | 3 | 4 | 3 | 3 | 1 | 2 | 4 | 4 | 3 | 2 | 2 | 5 | 2 | 4 | 3 | 3 | 2 | 3 | 5 | 4 | 2 | S         |
| 481 | DRD380 | 3 | 3 | 4 | 3 | 4 | 3 | 2 | 1 | 2 | 4 | 4 | 3 | 2 | 2 | 5 | 1 | 5 | 3 | 3 | 2 | 3 | 5 | 2 | 2 | S         |
| 482 | DRD382 | 3 | 3 | 4 | 3 | 4 | 3 | 3 | 1 | 2 | 4 | 4 | 3 | 2 | 2 | 5 | 1 | 4 | 3 | 3 | 2 | 3 | 5 | 2 | 2 | S         |
| 483 | DRD397 | 3 | 3 | 4 | 3 | 4 | 3 | 3 | 1 | 2 | 4 | 4 | 3 | 2 | 2 | 5 | 2 | 5 | 3 | 3 | 2 | 3 | 5 | 2 | 2 | S         |
| 484 | DRD452 | 3 | 3 | 4 | 3 | 4 | 3 | 3 | 1 | 2 | 4 | 4 | 3 | 2 | 2 | 5 | 1 | 4 | 3 | 3 | 2 | 3 | 5 | 2 | 2 | S         |
| 485 | DRD472 | 3 | 3 | 4 | 3 | 2 | 3 | 3 | 1 | 2 | 5 | 4 | 3 | 2 | 2 | 5 | 1 | 4 | 3 | 3 | 2 | 3 | 7 | 2 | 2 | S         |
| 486 | DRD523 | 3 | 3 | 4 | 3 | 4 | 3 | 3 | 1 | 2 | 4 | 4 | 3 | 2 | 2 | 5 | 1 | 4 | 3 | 3 | 2 | 3 | 5 | 2 | 2 | S         |
| 487 | DRD690 | 3 | 3 | 4 | 2 | 4 | 3 | 3 | 1 | 2 | 4 | 4 | 3 | 2 | 2 | 5 | 1 | 5 | 3 | 3 | 2 | 3 | 5 | 2 | 2 | S         |
| 488 | DRD692 | 3 | 3 | 4 | 2 | 4 | 3 | 3 | 1 | 2 | 4 | 4 | 3 | 2 | 2 | 4 | 1 | 5 | 3 | 3 | 2 | 3 | 5 | 2 | 2 | S         |
| 489 | DRD72  | 3 | 3 | 4 | 3 | 2 | 3 | 3 | 1 | 2 | 5 | 4 | 3 | 2 | 2 | 5 | 1 | 4 | 3 | 3 | 2 | 3 | 7 | 2 | 2 | S         |
| 490 | DRD225 | 2 | 4 | 4 | 1 | 2 | 5 | 1 | 2 | 2 | 2 | 3 | 3 | 4 | 2 | 5 | 1 | 1 | 3 | 3 | 3 | 3 | 6 | 3 | 2 | TUR       |
| 491 | DRD302 | 2 | 4 | 4 | 1 | 2 | 5 | 1 | 2 | 2 | 2 | 3 | 3 | 4 | 2 | 5 | 1 | 1 | 3 | 3 | 3 | 3 | 6 | 3 | 2 | TUR       |
| 492 | DRD305 | 2 | 4 | 4 | 1 | 2 | 5 | 1 | 2 | 2 | 2 | 3 | 3 | 4 | 2 | 5 | 1 | 1 | 3 | 3 | 3 | 3 | 6 | 3 | 2 | TUR       |
| 493 | DRD131 | 2 | 1 | 5 | 2 | 2 | 3 | 2 | 3 | 2 | 2 | 4 | 4 | 2 | 2 | 5 | 1 | 4 | 3 | 3 | 4 | 2 | 3 | 2 | 2 | Ugandal   |
| 494 | DRD146 | 2 | 1 | 5 | 2 | 3 | 3 | 2 | 3 | 2 | 3 | 4 | 4 | 2 | 2 | 5 | 1 | 4 | 3 | 3 | 4 | 2 | 3 | 2 | 2 | Ugandal   |
| 495 | DRD180 | 2 | 1 | 5 | 2 | 3 | 3 | 2 | 3 | 2 | 3 | 4 | 4 | 2 | 2 | 5 | 1 | 5 | 3 | 3 | 4 | 2 | 4 | 2 | 2 | Ugandal   |
| 496 | DRD23  | 2 | 1 | 5 | 2 | 3 | 3 | 2 | 3 | 2 | 2 | 4 | 4 | 2 | 2 | 5 | 1 | 5 | 3 | 3 | 4 | 2 | 4 | 2 | 2 | Ugandal   |
| 497 | DRD270 | 2 | 1 | 5 | 2 | 3 | 3 | 2 | 3 | 2 | 3 | 4 | 4 | 2 | 2 | 5 | 1 | 5 | 3 | 3 | 4 | 2 | 3 | 2 | 2 | Ugandal   |
| 498 | DRD29  | 2 | 1 | 5 | 2 | 2 | 3 | 2 | 3 | 2 | 2 | 4 | 4 | 2 | 2 | 5 | 1 | 5 | 3 | 3 | 4 | 2 | 4 | 2 | 2 | Ugandal   |
| 499 | DRD430 | 2 | 1 | 5 | 2 | 3 | 3 | 2 | 3 | 2 | 2 | 4 | 4 | 2 | 2 | 4 | 1 | 5 | 3 | 3 | 4 | 2 | 3 | 2 | 2 | Ugandal   |
| 500 | DRD434 | 2 | 1 | 5 | 2 | 3 | 3 | 2 | 3 | 2 | 2 | 4 | 4 | 2 | 2 | 5 | 1 | 4 | 3 | 3 | 4 | 2 | 4 | 2 | 2 | Ugandal   |
| 501 | DRD541 | 2 | 1 | 4 | 2 | 2 | 3 | 3 | 3 | 2 | 3 | 4 | 4 | 2 | 2 | 3 | 1 | 5 | 3 | 2 | 3 | 4 | 1 | 2 | 2 | Ugandal   |
| 502 | DRD543 | 2 | 1 | 5 | 2 | 3 | 3 | 2 | 3 | 2 | 2 | 4 | 4 | 2 | 2 | 5 | 1 | 4 | 3 | 3 | 3 | 2 | 4 | 2 | 2 | Ugandal   |
| 503 | DRD604 | 2 | 1 | 4 | 2 | 2 | 3 | 3 | 2 | 2 | 3 | 4 | 4 | 2 | 2 | 3 | 1 | 5 | 3 | 2 | 3 | 4 | 1 | 2 | 2 | Ugandal   |
| 504 | DRD656 | 2 | 2 | 5 | 2 | 3 | 3 | 2 | 3 | 2 | 2 | 4 | 4 | 2 | 2 | 5 | 1 | 4 | 3 | 3 | 4 | 2 | 4 | 2 | 2 | Ugandal   |
| 505 | DRD363 | 2 | 4 | 5 | 3 | 2 | 2 | 3 | 1 | 2 | 3 | 5 | 2 | 2 | 5 | 4 | 2 | 5 | 3 | 3 | 3 | 2 | 5 | 3 | 2 | Undefined |
| 506 | DRD384 | 2 | 1 | 5 | 2 | 5 | 3 | 2 | 2 | 2 | 3 | 3 | 4 | 2 | 2 | 5 | 1 | 3 | 3 | 3 | 3 | 4 | 4 | 2 | 2 | Undefined |
| 507 | DRD134 | 2 | 4 | 4 | 2 | 2 | 9 | 2 | 3 | 2 | 2 | 4 | 4 | 4 | 2 | 5 | 1 | 1 | 3 | 3 | 3 | 3 | 8 | 3 | 2 | URAL      |
| 508 | DRD277 | 2 | 4 | 4 | 2 | 2 | 9 | 2 | 3 | 2 | 2 | 4 | 4 | 4 | 2 | 5 | 1 | 1 | 3 | 3 | 3 | 3 | 8 | 3 | 2 | URAL      |
| 509 | DRD350 | 2 | 2 | 4 | 2 | 2 | 8 | 2 | 5 | 2 | 2 | 4 | 4 | 4 | 2 | 5 | 1 | 1 | 3 | 3 | 3 | 3 | 8 | 3 | 2 | URAL      |
| 510 | DRD353 | 2 | 4 | 4 | 2 | 2 | 9 | 2 | 3 | 2 | 2 | 4 | 4 | 4 | 2 | 5 | 1 | 1 | 3 | 3 | 3 | 3 | 8 | 3 | 2 | URAL      |
| 511 | DRD354 | 2 | 3 | 4 | 3 | 2 | 9 | 2 | 3 | 2 | 1 | 5 | 4 | 4 | 2 | 5 | 1 | 1 | 3 | 3 | 3 | 3 | 7 | 3 | 2 | URAL      |
| 512 | DRD368 | 2 | 3 | 4 | 3 | 2 | 9 | 2 | 3 | 2 | 1 | 5 | 4 | 4 | 2 | 5 | 1 | 1 | 3 | 3 | 3 | 3 | 8 | 3 | 2 | URAL      |
| 513 | DRD440 | 2 | 3 | 4 | 3 | 2 | 9 | 2 | 3 | 2 | 1 | 5 | 4 | 4 | 2 | 5 | 1 | 2 | 3 | 3 | 3 | 3 | 8 | 3 | 2 | URAL      |
| 514 | DRD487 | 2 | 3 | 4 | 3 | 2 | 8 | 2 | 3 | 2 | 1 | 5 | 4 | 4 | 2 | 5 | 1 | 1 | 3 | 3 | 2 | 3 | 8 | 3 | 2 | URAL      |
| 515 | DRD612 | 2 | 3 | 3 | 3 | 2 | 9 | 2 | 3 | 2 | 1 | 5 | 4 | 4 | 2 | 5 | 1 | 2 | 3 | 3 | 3 | 3 | 8 | 3 | 2 | URAL      |
| 516 | DRD613 | 2 | 4 | 4 | 2 | 2 | 9 | 2 | 3 | 2 | 2 | 4 | 4 | 4 | 2 | 5 | 1 | 1 | 3 | 3 | 3 | 3 | 8 | 3 | 2 | URAL      |
| 517 | DRD675 | 2 | 2 | 4 | 2 | 2 | a | 2 | 5 | 2 | 2 | 4 | 4 | 4 | 2 | 5 | 1 | 1 | 3 | 3 | 3 | 3 | 8 | 3 | 2 | URAL      |
| 518 | DRD227 | 2 | 2 | 3 | 2 | 5 | 4 | 3 | 4 | 2 | 4 | 3 | 4 | 4 | 2 | 5 | 1 | 5 | 3 | 3 | 3 | 6 | 7 | 3 | 2 | X         |
| 519 | DRD248 | 2 | 2 | 2 | 2 | 5 | 4 | 3 | 4 | 2 | 4 | 3 | 4 | 4 | 2 | 5 | 1 | 5 | 3 | 3 | 3 | 6 | 8 | 3 | 2 | X         |

|     |        |   |   |   |   |   |   |   |   |   |   |   |   |   |   |   |   |   |   |   |   |   |   |   |   |   |
|-----|--------|---|---|---|---|---|---|---|---|---|---|---|---|---|---|---|---|---|---|---|---|---|---|---|---|---|
| 520 | DRD355 | 2 | 2 | 3 | 2 | 5 | 4 | 3 | 4 | 2 | 4 | 3 | 4 | 4 | 2 | 5 | 1 | 5 | 3 | 3 | 3 | 5 | 8 | 3 | 2 | X |
| 521 | DRD379 | 2 | 2 | 3 | 2 | 5 | 3 | 3 | 4 | 2 | 4 | 3 | 4 | 4 | 2 | 5 | 1 | 5 | 3 | 3 | 3 | 6 | 8 | 3 | 2 | X |
| 522 | DRD431 | 2 | 2 | 3 | 2 | 4 | 4 | 3 | 4 | 2 | 4 | 3 | 4 | 4 | 2 | 5 | 1 | 5 | 3 | 3 | 3 | 6 | 7 | 3 | 2 | X |
| 523 | DRD473 | 2 | 2 | 3 | 2 | 5 | 4 | 3 | 4 | 2 | 4 | 3 | 4 | 3 | 2 | 5 | 1 | 5 | 3 | 3 | 3 | 6 | 8 | 3 | 2 | X |
| 524 | DRD6   | 2 | 2 | 4 | 2 | 5 | 3 | 3 | 4 | 2 | 4 | 3 | 4 | 4 | 2 | 5 | 1 | 5 | 3 | 3 | 3 | 6 | 9 | 3 | 2 | X |
